# Supplementary material for: Open Access to Knowledge in the Modern University: Ukrainian situation
Source: Royal Society of Chemistry journal article supplement (doi:10.1039/d0cc04903d), 2011-01-01
Supplement: d0cc04903d1.pdf [file d0cc04903d1.pdf]

1                    **Boosting the sensitivity of in vitro  $\beta$ -lactam allergy diagnostic tests**

2  
3                    Edurne Peña-Mendizabal<sup>a</sup>, Sergi Morais<sup>\*a,b,c</sup> and Ángel Maquieira<sup>\*a,b,c</sup>

4  
5                    <sup>a</sup> *IDM, Universitat Politècnica de València- Universitat de València, Camino de vera s/n,*

6                                            *46022 Valencia, Spain.*

7                                            *E-mail: smorais@upv.es; amaquieira@qim.upv.es Instituto*

8                    <sup>b</sup> *Departamento de Química, Universitat Politècnica de València, Camino de vera s/n, 46022,*

9                                            *Valencia, Spain*

10                    <sup>c</sup> *Unidad Mixta UPV-La Fe, Nanomedicine and Sensors, IIS La Fe, Valencia, Spain*

11  
12

13 **ELECTRONIC SUPPLEMENTARY INFORMATION (ESI)**

14

|    |                                                                       |    |
|----|-----------------------------------------------------------------------|----|
| 15 | EXPERIMENTAL .....                                                    | 3  |
| 16 | 1 General Experimental .....                                          | 3  |
| 17 | 2. Chemicals, immunoreagents and buffers .....                        | 4  |
| 18 | 3. Synthesis of BLC-derived haptens .....                             | 4  |
| 19 | 3.1. BLC-oyl derivates .....                                          | 5  |
| 20 | 3.2. BLC-anyl derivates .....                                         | 7  |
| 21 | 4. NMR spectra .....                                                  | 10 |
| 22 | 5. Preparation of the antigens .....                                  | 24 |
| 23 | 6. MS-MALDI-TOF spectra .....                                         | 25 |
| 24 | Control HSA .....                                                     | 25 |
| 25 | PG antigens .....                                                     | 26 |
| 26 | AMX antigens .....                                                    | 29 |
| 27 | 7. Assay protocol for the evaluation of the structural antigens ..... | 31 |
| 28 | 8. Patients .....                                                     | 33 |
| 29 | 9. Experimental references .....                                      | 36 |

30

31

## 32 EXPERIMENTAL

### 33 1 General Experimental

34 NMR Spectra:  $^1\text{H}$  and  $^{13}\text{C}$ -NMR spectra were recorded on Bruker AVIIIHD NanoBay  
35 400MHz spectrometer using TOPSPIN software. Proton and carbon chemical shifts ( $\delta^1\text{H}$ ,  
36  $\delta^{13}\text{C}$ ) are quoted in ppm and referenced to tetramethylsilane with residual protonated solvent  
37 as the internal standard. Resonances are described using the following abbreviations; s  
38 (singlet), d (doublet), t (triplet), q (quartet), quin. (quintet), m (multiplet), br (broad), app  
39 (apparent), dd (doublet of doublets), etc. Coupling constants (J) are given in Hz and are  
40 rounded to the nearest 0.1 Hz.

41 Mass Spectra: High resolution mass spectra were recorded using a AB SCIEX TripleTOF™  
42 5600 LC/MS/MS System. The LC system used was an Agilent 1290 HPLC system. The  
43 analyses were performed using an Agilent EC-C<sub>18</sub>. The data acquisition used are in positive  
44 mode, over a mass range of 100 – 950 m/z. The MS was using an IDA acquisition method  
45 with: the survey scan type (TOF-MS) and the dependent scan type (product ion) using 35V of  
46 collision energy. Data was evaluated using the qualitatively evaluated using the Peak View™  
47 software. m/z values are reported in Daltons; high resolution values are calculated to four  
48 decimal places from the molecular formula, all found values being within a tolerance of 5  
49 ppm.

50 Chromatography techniques: TLC was performed on Merck Glass TLC silica gel 60 F<sub>254</sub> 0.2  
51 mm precoated plates and visualised using ultraviolet light and potassium permanganate stain.

52 MS-MALDI-TOF: The samples were analyzed in a 5800 MALDI TOF-TOF (ABSciex) in  
53 positive linear mode (1500 shots every position) in a mass range of 15000-100000 m/z.

54

55

## 56 2. Chemicals, immunoreagents and buffers

57 Benzylpenicillin sodium salt, amoxicillin trihydrate, aztreonam (AZT), 1,3-diaminopropane,  
58 1,5-diaminopentane, 1,7-diaminoheptane, ethylene diamine dihydrochloride, 1,4-  
59 diaminobutane dihydrochloride, 1,4-phenylenediamine dihydrochloride, N-(3-  
60 dimethylaminopropyl)-N'-ethylcarbodiimide hydrochloride (EDC), N-hydroxysuccinimide  
61 (NHS), N,N'-dicyclohexylcarbodiimide (DCC), anhydrous di-tert-butyl dicarbonate  
62 ((Boc)<sub>2</sub>O), sodium bicarbonate, Tween 20, human serum albumin (HSA), histone from calf  
63 thymus (H1) and keyhole limpet hemocyanin (KLH) are from Sigma-Aldrich (Madrid,  
64 Spain). Dichloromethane (DCM), N,N-dimethylformamide (DMF), dioxane, ethyl acetate,  
65 hydrochloric acid 37 % (HCl) and buffer salts are from Scharlau (Sentmenat, Spain) and used  
66 without further purification. Deuterated dimethyl sulfoxide (DMSO-d<sub>6</sub>) is from ACROS  
67 Organics (New Jersey, USA). Specific anti-β-lactam IgE artificial human sera (ARTHUS) to  
68 PG is kindly provided by Dr. Fooke (Neuss, Germany) and anti-human IgE monoclonal  
69 antibody is from Ingenasa, S.A. (Madrid, Spain). Polyclonal secondary antibody goat α-rabbit  
70 IgG labelled with horseradish peroxidase (GAR-HRP) and goat anti-mouse antibody labelled  
71 with horseradish peroxidase (GAM-HRP) are purchased from Abcam (San Francisco, USA).  
72 IgE human serum (3rd WHO International Standard) is purchased from National Institute for  
73 Biological Standards and Control (NIBSC) (Hertfordshire, UK) and tetramethylbenzidine  
74 (TMB) substrate is from SDT GmbH (Baesweiler, Germany). Omalizumab antibody and  
75 Coomassie Brilliant Blue R-250 staining solution are from Bio-Rad (Madrid, Spain). Amicon  
76 Ultra 0.5 pre-concentred 10 K filters are from Fisher Scientific (Madrid, Spain).

77 The employed buffers are: (I) sodium phosphate buffer 0.1 M, sodium chloride 0.15 M, pH  
78 7.2; (II) MES 0.1 M, pH 4.7; (III) sodium carbonate 0.5 M, pH 11.0; (IV) phosphate buffer  
79 saline (PBS 1X, 0.008 M sodium phosphate dibasic, 0.002 M sodium phosphate monobasic,  
80 0.137 M sodium chloride, 0.003 M potassium chloride, pH 7.4); (V) PBS-T (PBS 1X  
81 containing 0.05% Tween 20); and (VI) sodium carbonate/bicarbonate buffer 0.1 M, pH 9.6,  
82 as printing buffer. All buffers are filtered through a 0.45-μm pore size nitrocellulose  
83 membrane from Thermo Fisher Scientific (Madrid, Spain) before being used.

## 84 3. Synthesis of BLC-derived haptens

### 85 *Boc-amoxicillin*

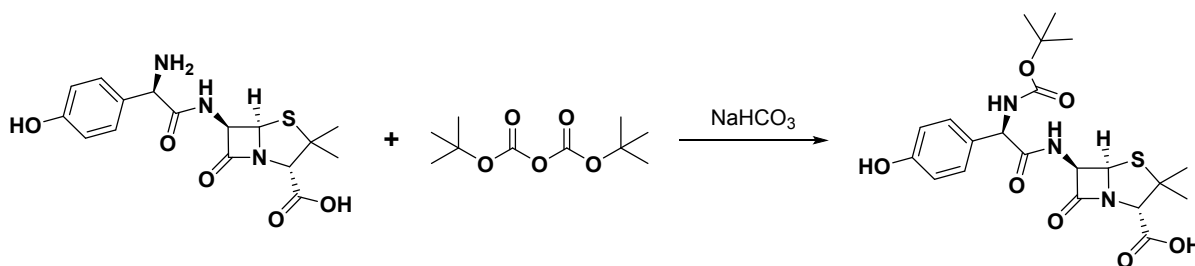

86

87 NaHCO<sub>3</sub> (200 mg, 2.38 mmol, 2 equiv.) is added to a solution of amoxicillin (440 mg, 1.19  
88 mmol) in 150 mL H<sub>2</sub>O and stirred at 5 °C. Anhydrous (Boc)<sub>2</sub>O (390 mg, 1.79 mmol, 1.5  
89 equiv.) dissolved in 1.5 mL dioxane is added dropwise and the mixture is allowed to react at  
90 0 °C for 1 h and then overnight at room temperature. The organic layer is extracted and  
91 washed twice with EtOAc and saturated NaHCO<sub>3</sub>, respectively. Aqueous layers are mixed  
92 and acidified with HCl 6 M to pH 1 and extracted three times with EtOAc. Organic layers are  
93 collected and dried over NaSO<sub>4</sub>. The solvent was evaporated and the desired compound dried  
94 under reduced pressure. Yield: 97%. <sup>1</sup>H NMR (400 MHz, DMSO-d<sub>6</sub>): δ 9.36 (s, 1H), 8.73 (d,

95 J = 7.9 Hz, 1H), 7.18 (d, J = 9.7 Hz, 2H), 6.66 (d, J = 8.3 Hz, 2H), 5.45 (dd, J = 7.8, 4.2 Hz,  
96 1H), 5.37 (d, J = 4.2 Hz, 1H), 5.25 (d, J = 8.5 Hz, 1H), 4.15 (s, 1H), 1.91 (s, 1H), 1.55 (s,  
97 3H), 1.41 (s, 3H), 1.38 (s, 9H). <sup>13</sup>C NMR (100 MHz, DMSO-d<sub>6</sub>): δ 173.30, 170.46, 168.99,  
98 156.80, 128.46, 114.86, 78.16, 70.47, 67.50, 66.36, 64.19, 59.80, 57.91, 30.52, 28.19, 26.71,  
99 13.85. HRMS (ESI-TOF) m/z calculated for C<sub>21</sub>H<sub>27</sub>N<sub>3</sub>O<sub>7</sub>S ([M+H<sup>+</sup>]): 466.1642, found  
100 466.2539.

101

### 102 3.1. BLC-oyl derivatives

103 0.150 mmol of the corresponding BLC dissolved in deionized water (0.1 M) was basified by  
104 slow addition of sodium carbonate 0.5 M, pH 11.0. Then, 0.165 mmol (1.1 equiv) of the  
105 corresponding diamine was added dropwise at 0 °C under nitrogen atmosphere. The reaction  
106 was stirred at room temperature for 3 h followed by an acidification to pH 4.0 with HCl 6.0  
107 M. The solution was filtrated and the desired precipitate washed twice with acidified water.  
108 The compound was allowed to dry under vacuum to give a white powder that was  
109 characterized by NMR and MS and used without further purification. Yield of the reaction  
110 was corrected by measuring the amount of salts (Na<sub>2</sub>CO<sub>3</sub> and NH<sub>4</sub>Cl) present. Haptens **1-6**  
111 (Scheme S1) were obtained through this route.

### 112 Hapten 1

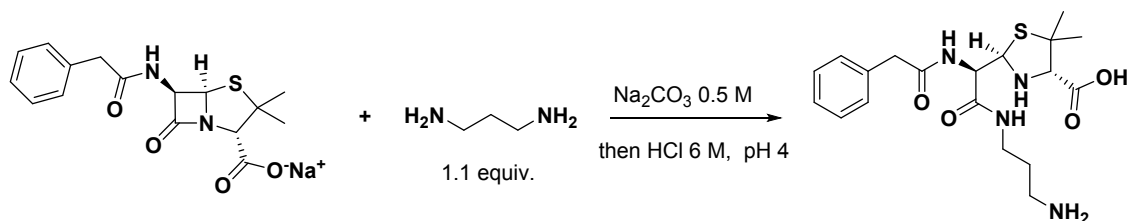

114 Yield: 97%. HRMS (ESI-TOF) m/z calculated for C<sub>19</sub>H<sub>28</sub>N<sub>4</sub>O<sub>4</sub>S ([M+H<sup>+</sup>]): 409.1904, found  
115 409.1906.

116

### 117 Hapten 2

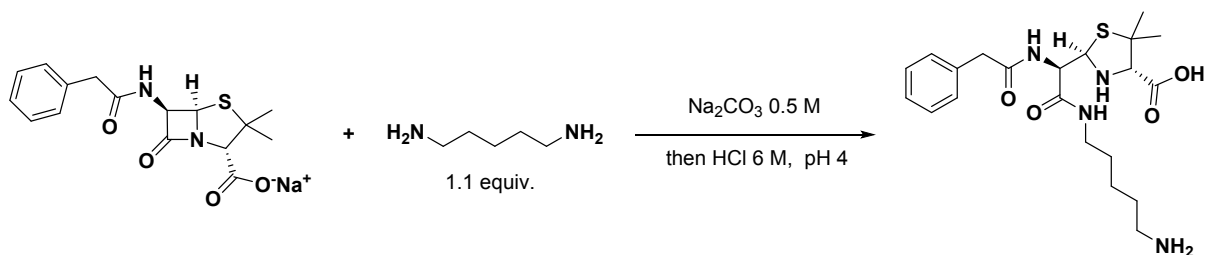

119 Yield: 61%. HRMS (ESI-TOF) m/z calculated for C<sub>21</sub>H<sub>32</sub>N<sub>4</sub>O<sub>4</sub>S ([M+H<sup>+</sup>]): 437.2217, found  
120 437.2222.

121

### 122 Hapten 3

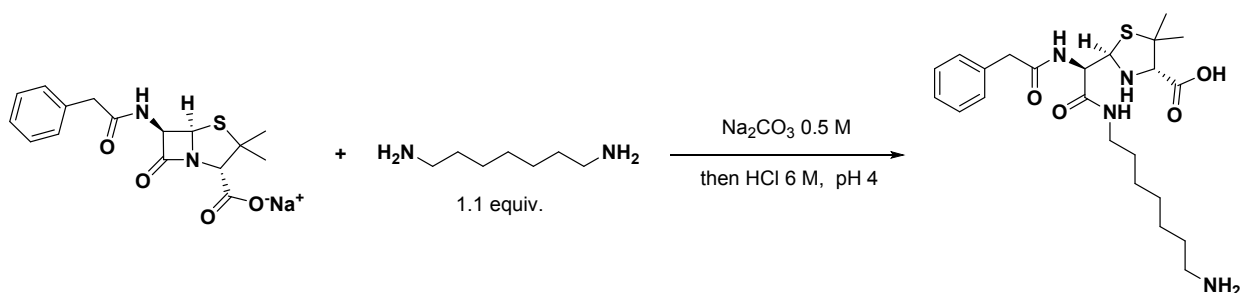

123

124 Yield: 77%. HRMS (ESI-TOF) m/z calculated for  $C_{23}H_{36}N_4O_4S$  ( $[M+H^+]$ ): 465.2530, found  
 125 465.2527.

126

127 *Hapten 4*

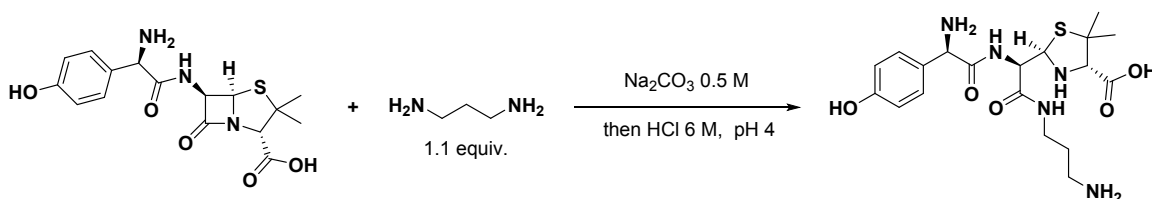

128

129 Yield: 100%. HRMS (ESI-TOF) m/z calculated for  $C_{19}H_{29}N_5O_5S$  ( $[M+H^+]$ ): 440.1962, found  
 130 440.1971.

131

132 *Hapten 5*

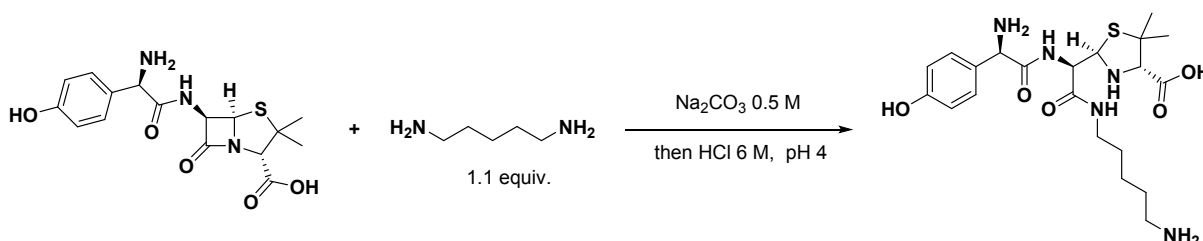

133

134 Yield: 80%. HRMS (ESI-TOF) m/z calculated for  $C_{21}H_{33}N_5O_5S$  ( $[M+H^+]$ ): 468.2275, found  
 135 468.3913.

136

137 *Hapten 6*

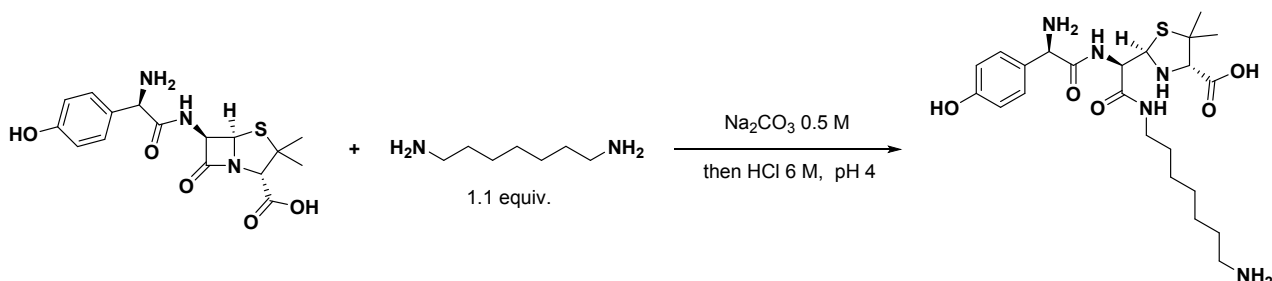

138

139

140 Yield: 100%. HRMS (ESI-TOF) m/z calculated for  $C_{23}H_{37}N_5O_5S$  ( $[M+H^+]$ ): 496.2588, found  
 141 496.2589.

142

143 3.2. BLC-anyl derivates

144 0.165 mmol (1.1 equiv) of the corresponding diamine was added dropwise at 0 °C under  
145 nitrogen atmosphere to 0.150 mmol of the corresponding BLC (the free acid) dissolved in  
146 DCM/DMF (0.1 M), treated with NHS and DCC (1 equiv.). The reaction was stirred for 3 h  
147 at room temperature. The solution mixture was filtered under vacuum, concentrated and dried  
148 under reduced pressure to give a white powder that was characterized by NMR and MS and  
149 used without further purification. Haptens 7-13 (Scheme S1) were obtained though this route.

150

151 *Hapten 7*

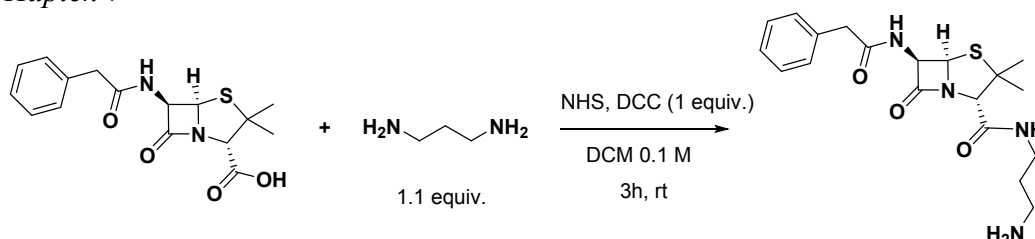

152

153 Yield: 100%. HRMS (ESI-TOF) m/z calculated for C<sub>19</sub>H<sub>26</sub>N<sub>4</sub>O<sub>3</sub>S ([M+H<sup>+</sup>]): 391.1798, found  
154 391.1802.

155

156 *Hapten 8*

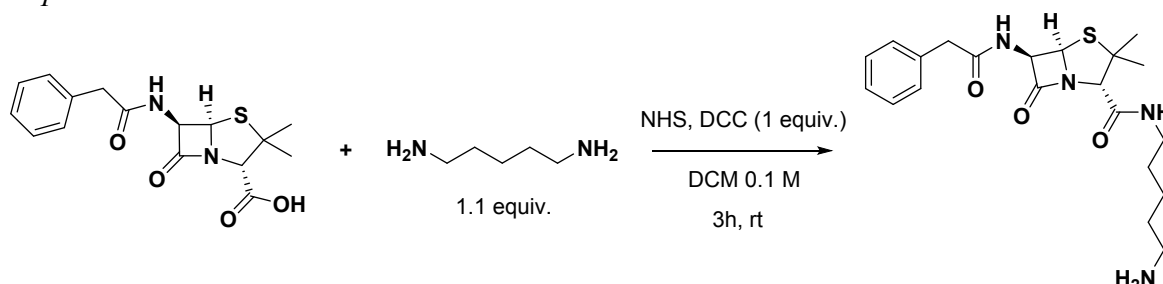

157

158 Yield: 66%. HRMS (ESI-TOF) m/z calculated for C<sub>21</sub>H<sub>30</sub>N<sub>4</sub>O<sub>3</sub>S ([M+H<sup>+</sup>]): 419.2111, found  
159 419.2119.

160

161 *Hapten 9*

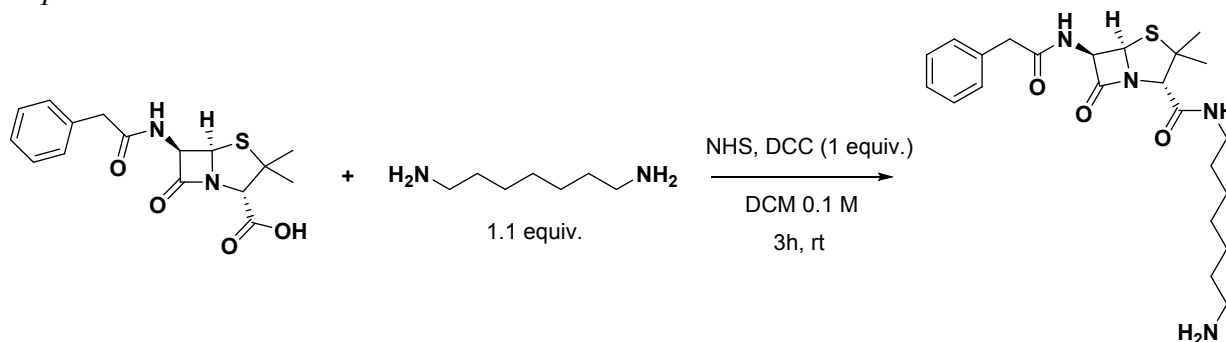

162

163 Yield: 77%. HRMS (ESI-TOF) m/z calculated for C<sub>23</sub>H<sub>34</sub>N<sub>4</sub>O<sub>3</sub>S ([M+H<sup>+</sup>]): 447.2424, found  
164 447.2430.

165

166 *Hapten 10*

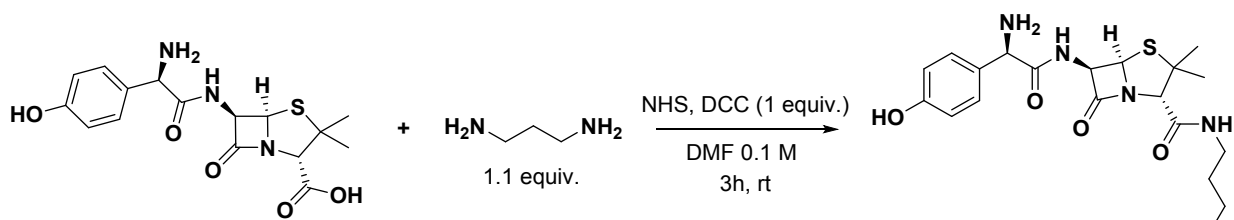

167  
 168 Yield: 51%. HRMS (ESI-TOF)  $m/z$  calculated for  $C_{19}H_{27}N_5O_4S$  ( $[M+H^+]$ ): 422.1857, found  
 169 422.1862.  
 170  
 171 *Hapten 11*

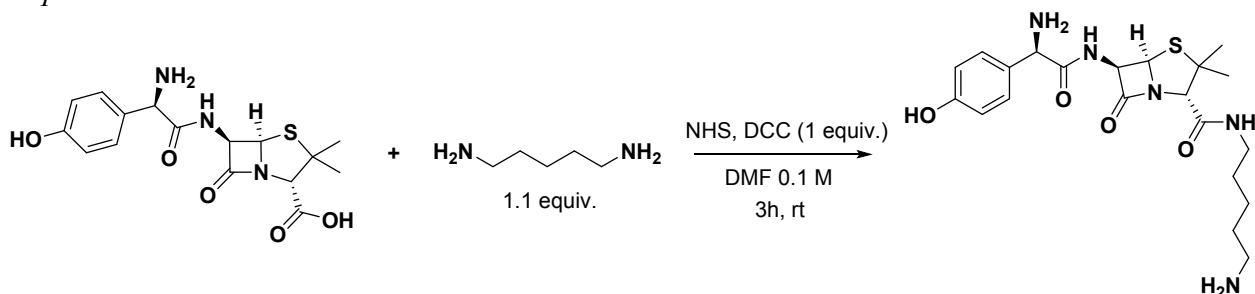

172  
 173 Yield: 14%. HRMS (ESI-TOF)  $m/z$  calculated for  $C_{21}H_{31}N_5O_4S$  ( $[M+H^+]$ ): 450.2170, found  
 174 450.2911.  
 175  
 176 *Hapten 12*

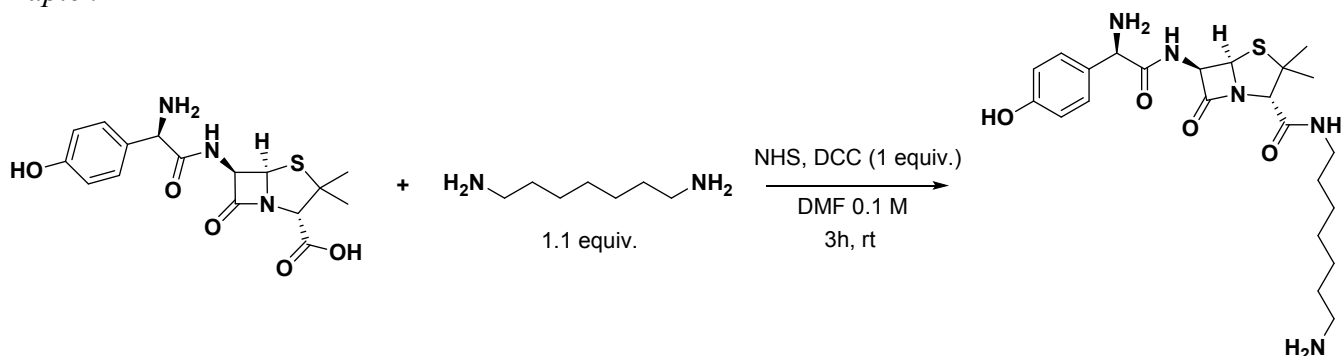

177  
 178 Yield: 81%. HRMS (ESI-TOF)  $m/z$  calculated for  $C_{23}H_{35}N_5O_4S$  ( $[M+H^+]$ ): 478.2483, found  
 179 478.3226.  
 180  
 181 *Hapten 13*

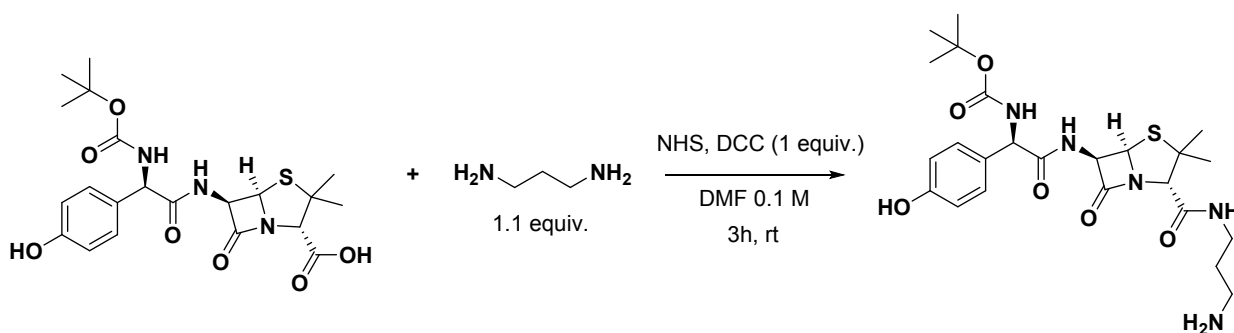

182  
 183 Yield: 85%. HRMS (ESI-TOF)  $m/z$  calculated for  $C_{24}H_{35}N_5O_6S$  ( $[M+H^+]$ ): 522.2381, found  
 184 522.2561.  
 185



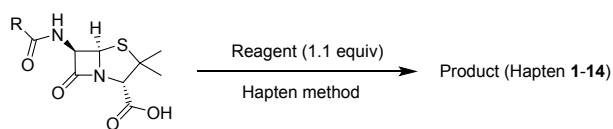

| Entry | BLC | R | Reagent (1.1 equiv)                                                                                      | Yield <sup>[a]</sup> (%) | Hapten method <sup>[b]</sup> |
|-------|-----|---|----------------------------------------------------------------------------------------------------------|--------------------------|------------------------------|
| 1     | PG  |   | $\text{H}_2\text{N}-\text{CH}_2-\text{CH}_2-\text{NH}_2$                                                 | 97                       | -oyl                         |
| 2     | PG  |   | $\text{H}_2\text{N}-\text{CH}_2-\text{CH}_2-\text{CH}_2-\text{CH}_2-\text{NH}_2$                         | 61                       | -oyl                         |
| 3     | PG  |   | $\text{H}_2\text{N}-\text{CH}_2-\text{CH}_2-\text{CH}_2-\text{CH}_2-\text{CH}_2-\text{CH}_2-\text{NH}_2$ | 77                       | -oyl                         |
| 4     | AMX |   | $\text{H}_2\text{N}-\text{CH}_2-\text{CH}_2-\text{NH}_2$                                                 | 100                      | -oyl                         |
| 5     | AMX |   | $\text{H}_2\text{N}-\text{CH}_2-\text{CH}_2-\text{CH}_2-\text{CH}_2-\text{NH}_2$                         | 80                       | -oyl                         |
| 6     | AMX |   | $\text{H}_2\text{N}-\text{CH}_2-\text{CH}_2-\text{CH}_2-\text{CH}_2-\text{CH}_2-\text{CH}_2-\text{NH}_2$ | 100                      | -oyl                         |
| 7     | PG  |   | $\text{H}_2\text{N}-\text{CH}_2-\text{CH}_2-\text{NH}_2$                                                 | 100                      | -anyl                        |
| 8     | PG  |   | $\text{H}_2\text{N}-\text{CH}_2-\text{CH}_2-\text{CH}_2-\text{CH}_2-\text{NH}_2$                         | 66                       | -anyl                        |
| 9     | PG  |   | $\text{H}_2\text{N}-\text{CH}_2-\text{CH}_2-\text{CH}_2-\text{CH}_2-\text{CH}_2-\text{CH}_2-\text{NH}_2$ | 77                       | -anyl                        |
| 10    | AMX |   | $\text{H}_2\text{N}-\text{CH}_2-\text{CH}_2-\text{NH}_2$                                                 | 51                       | -anyl                        |
| 11    | AMX |   | $\text{H}_2\text{N}-\text{CH}_2-\text{CH}_2-\text{CH}_2-\text{CH}_2-\text{NH}_2$                         | 14 <sup>[c]</sup>        | -anyl                        |
| 12    | AMX |   | $\text{H}_2\text{N}-\text{CH}_2-\text{CH}_2-\text{CH}_2-\text{CH}_2-\text{CH}_2-\text{CH}_2-\text{NH}_2$ | 81                       | -anyl                        |
| 13    | AMX |   | $\text{H}_2\text{N}-\text{CH}_2-\text{CH}_2-\text{NH}_2$                                                 | 85                       | -anyl                        |
| 14    | PG  |   | -                                                                                                        |                          | Reference                    |

186

187 **Scheme S1:** Chemical structures of the BLC synthesized haptens using alkyl diamines. [a]  
 188 Isolated yields were reported. [b] Reaction conditions: (I) -oyl haptens:  $\text{Na}_2\text{CO}_3$  0.5 M, pH  
 189 11.0, then HCl 6.0 M, pH=4.0, 3h, rt; (II) -anyl haptens: DCM/DMF 0.1 M, 3h, rt. [c] Poor  
 190 yield due to transfer losses.

191 4. NMR spectra

192 *Boc-amoxicillin*

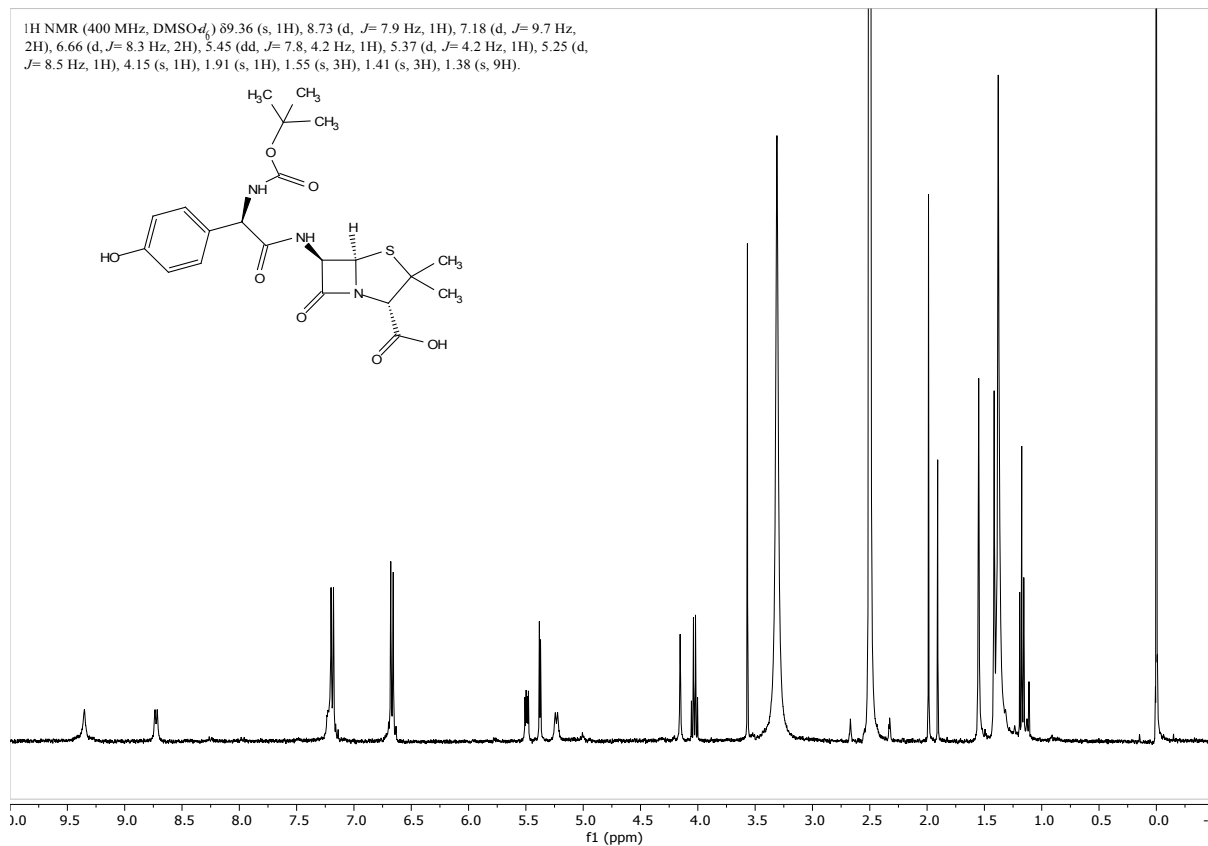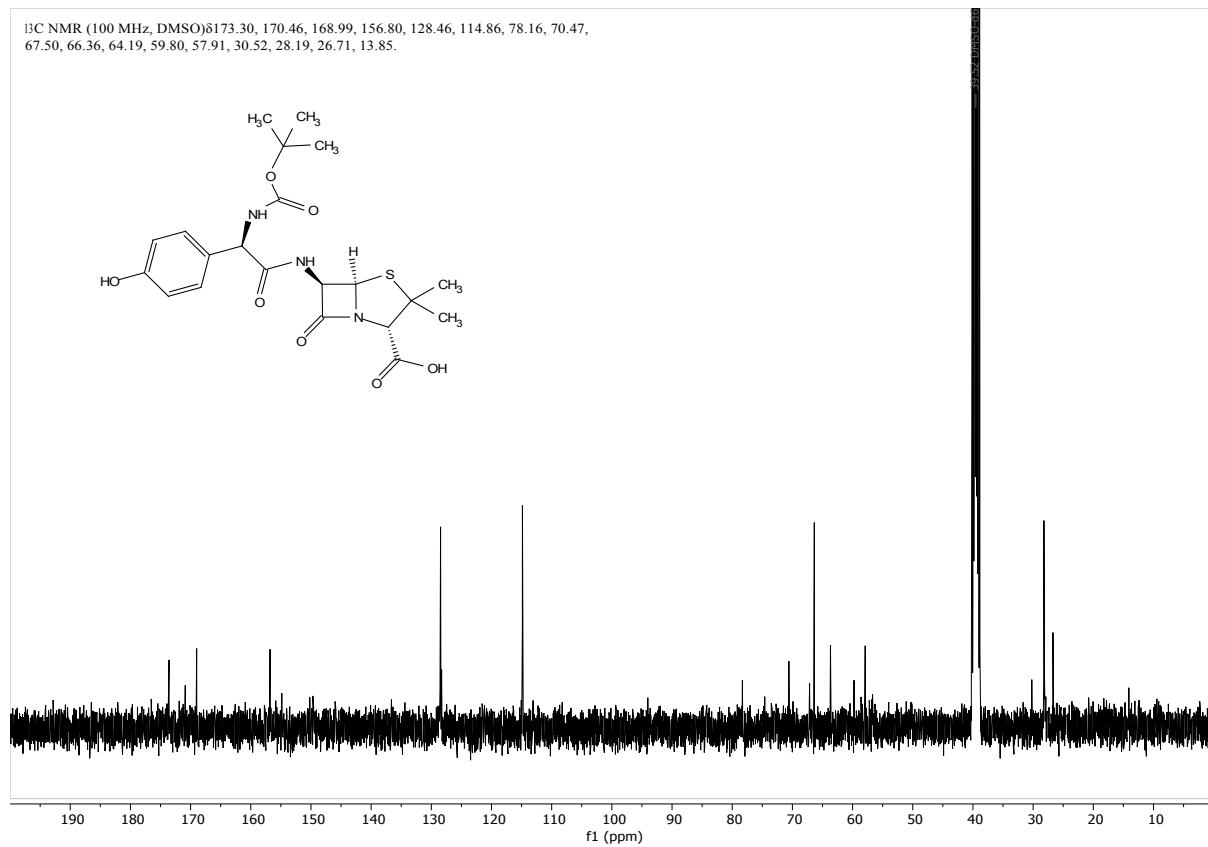

195 *Hapten 1*

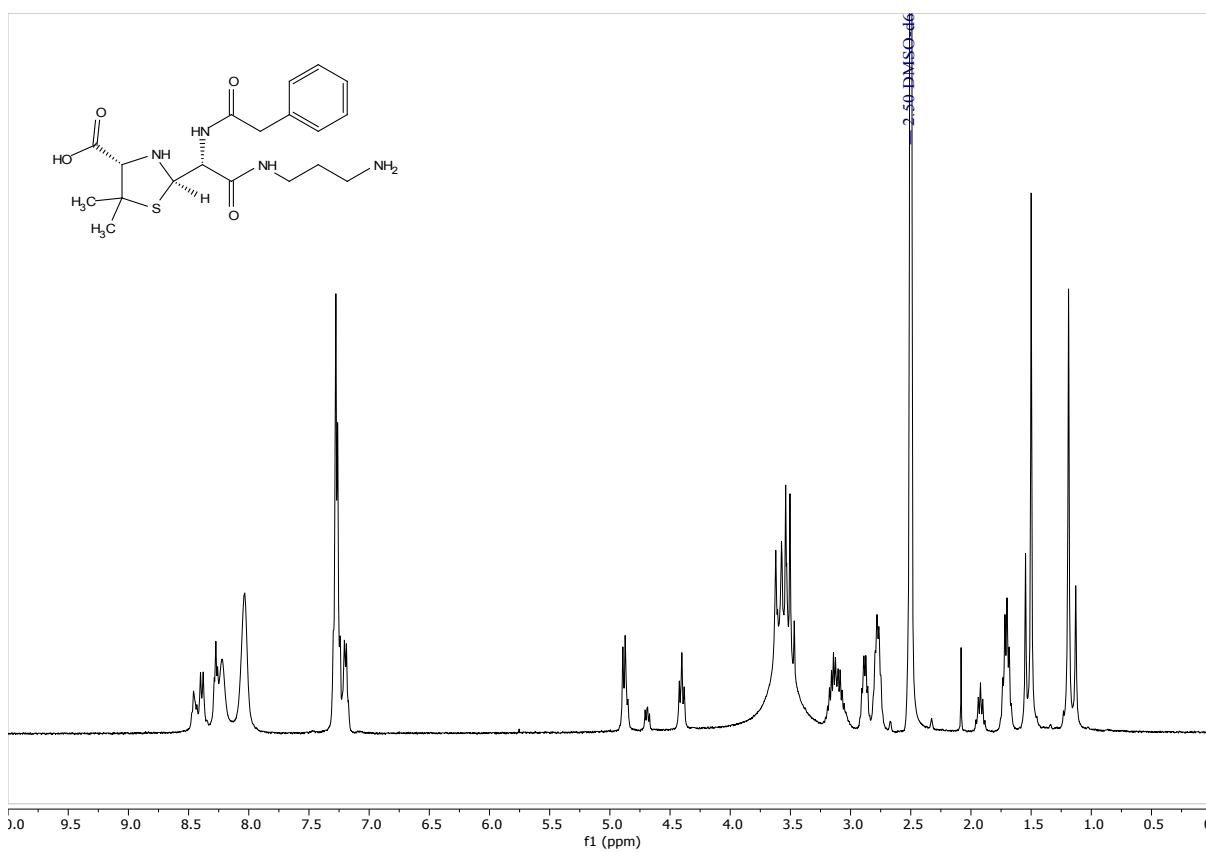

196

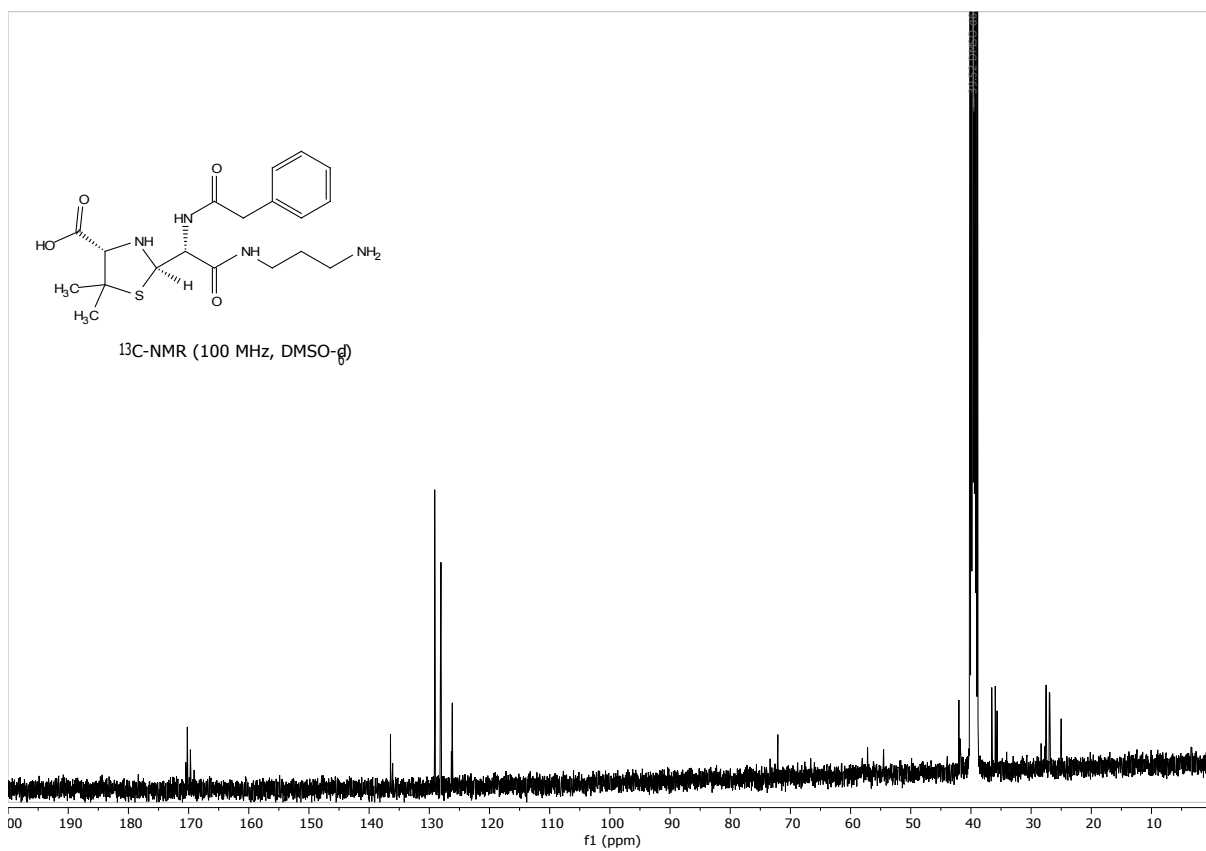

197

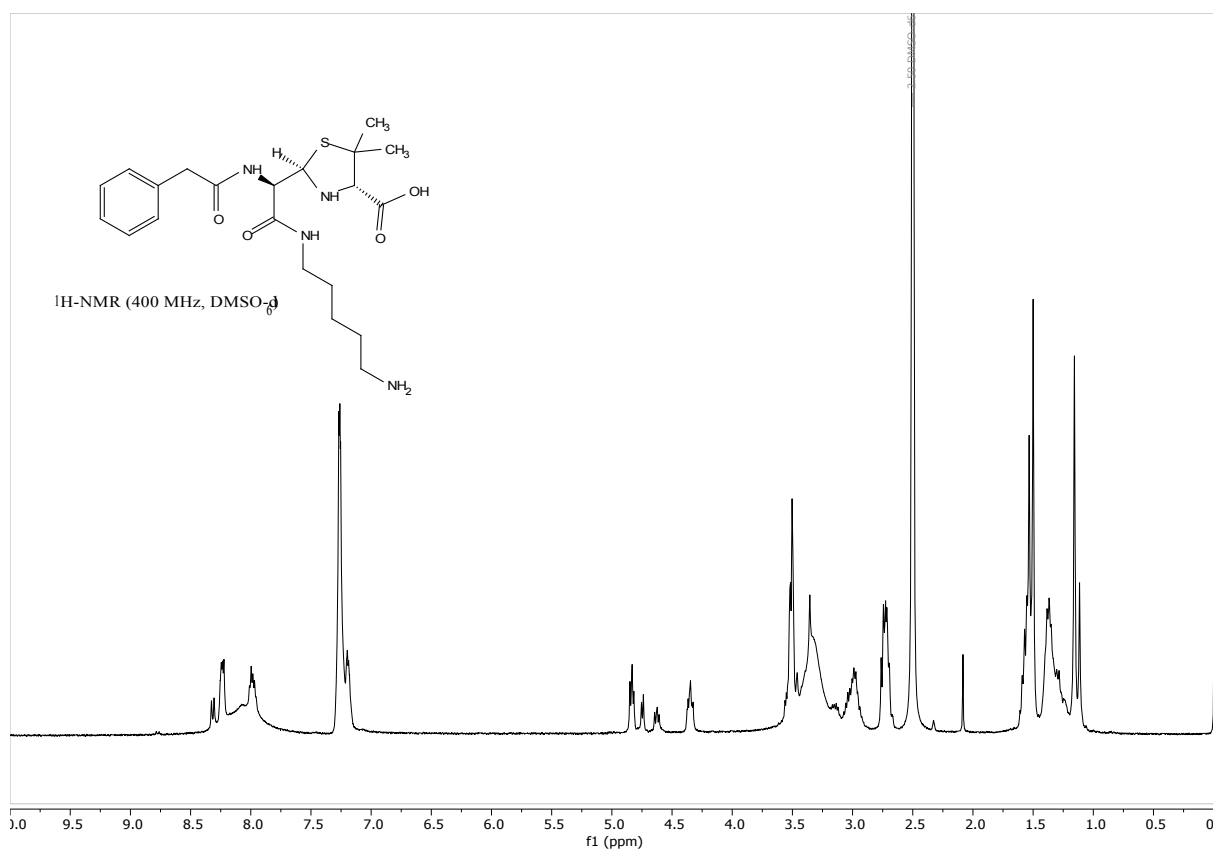

199

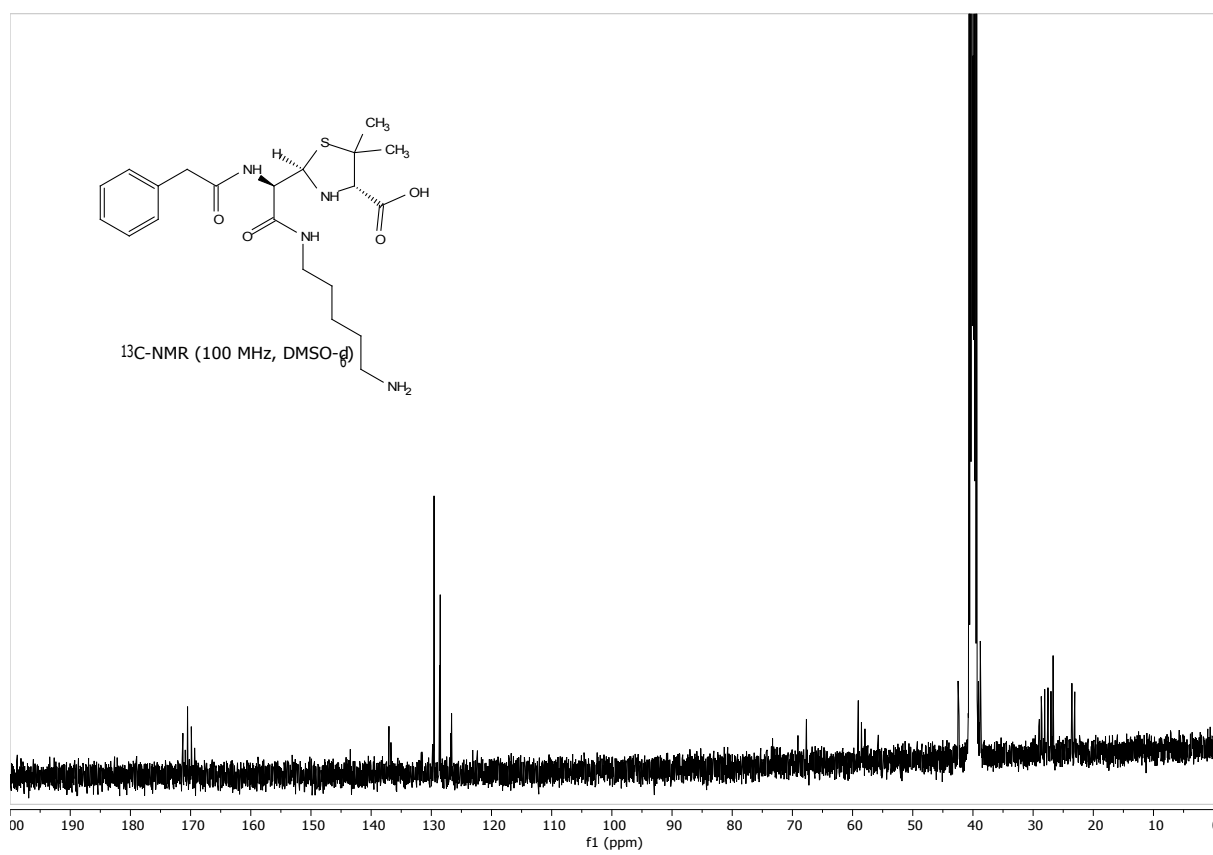

200

201 *Hapten 3*

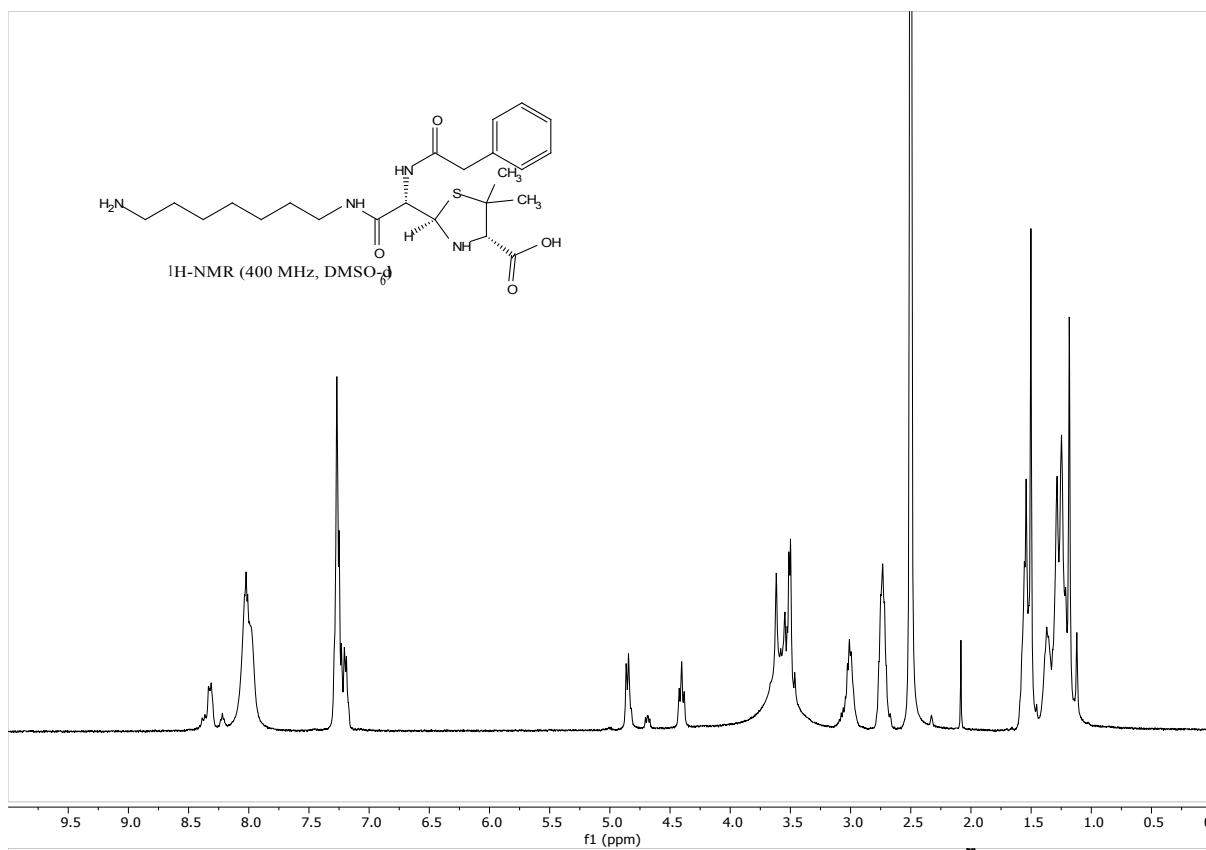

202

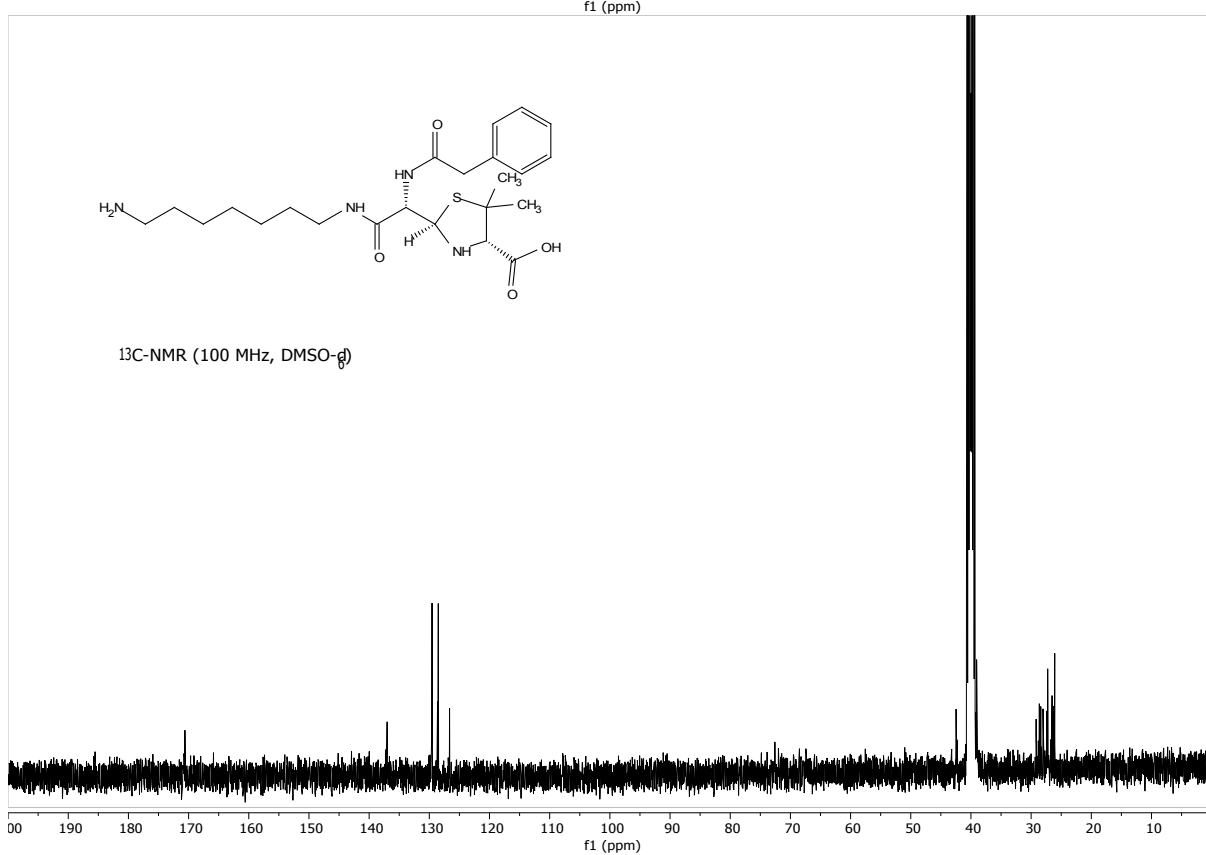

203

204 Hapten 4

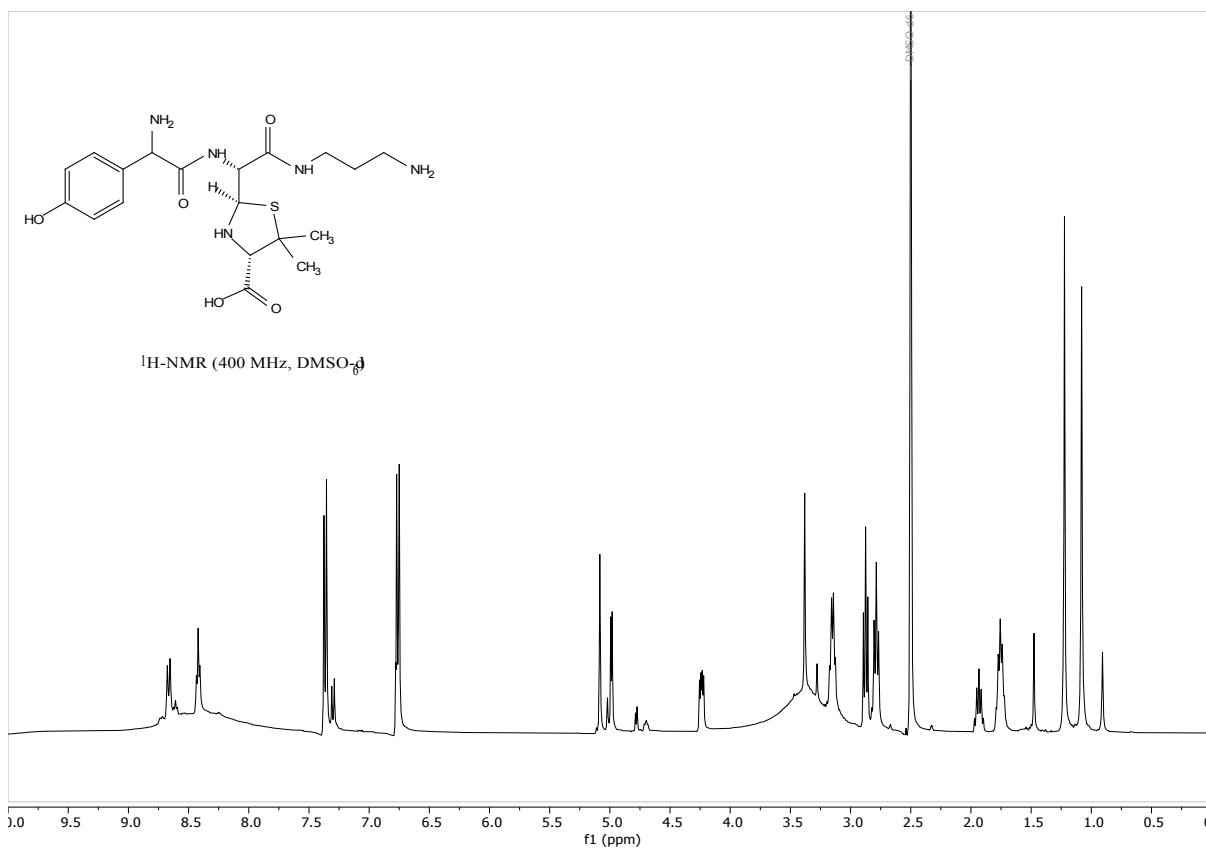

205

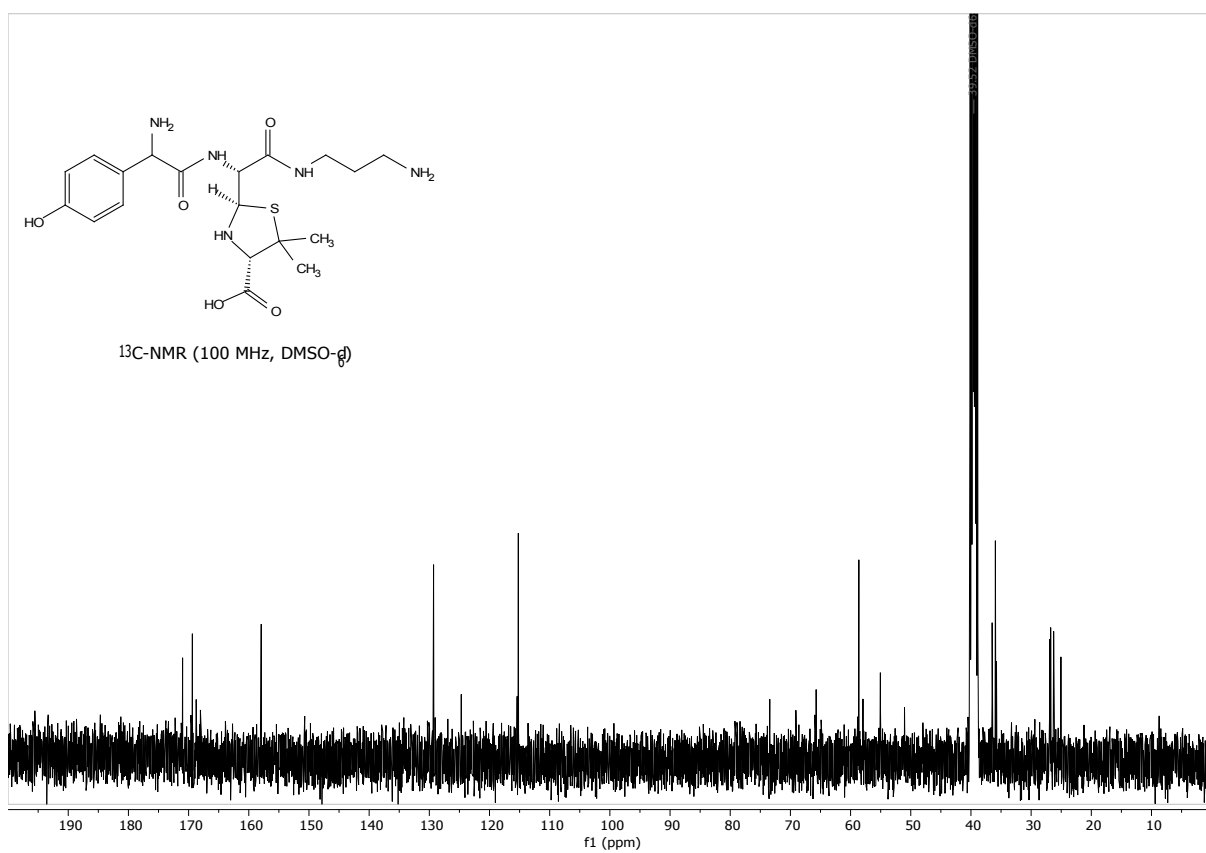

206

207 Hapten 5

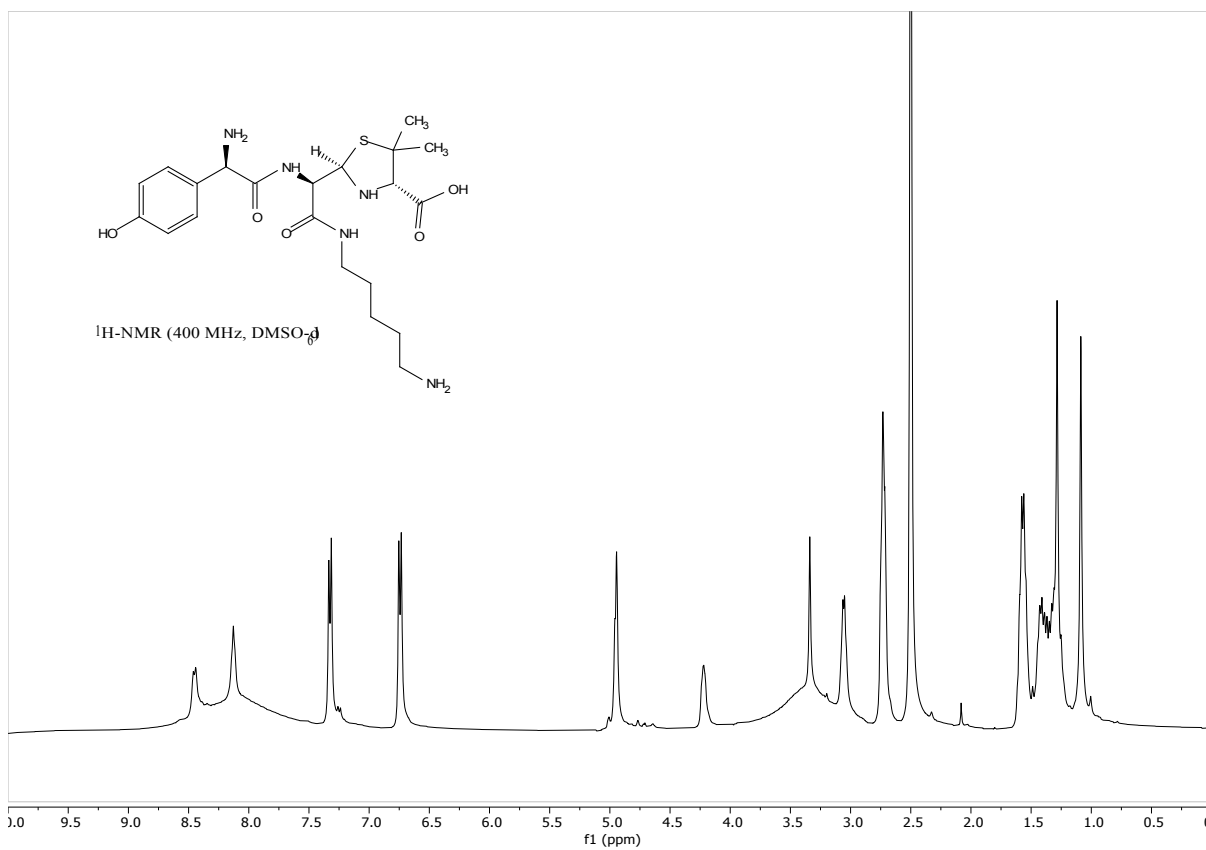

208

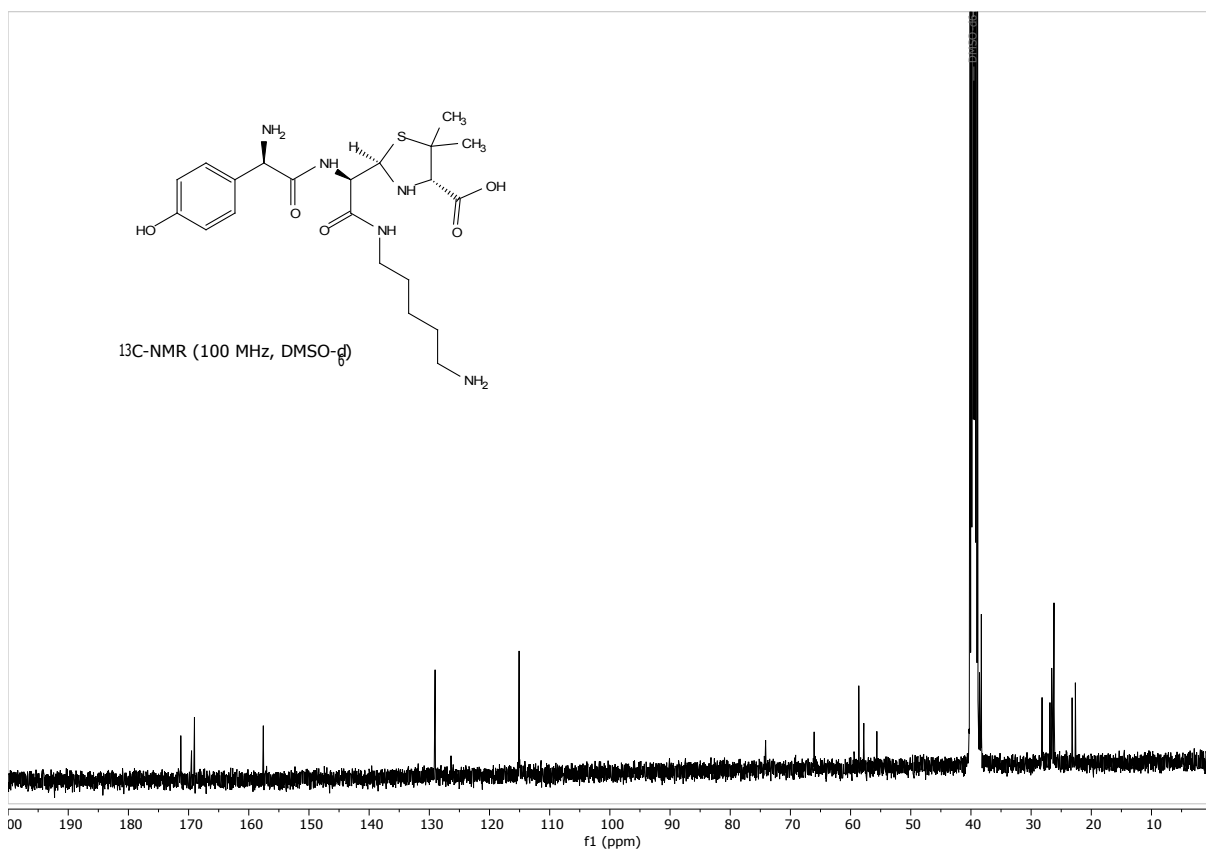

209

210 Hapten 6

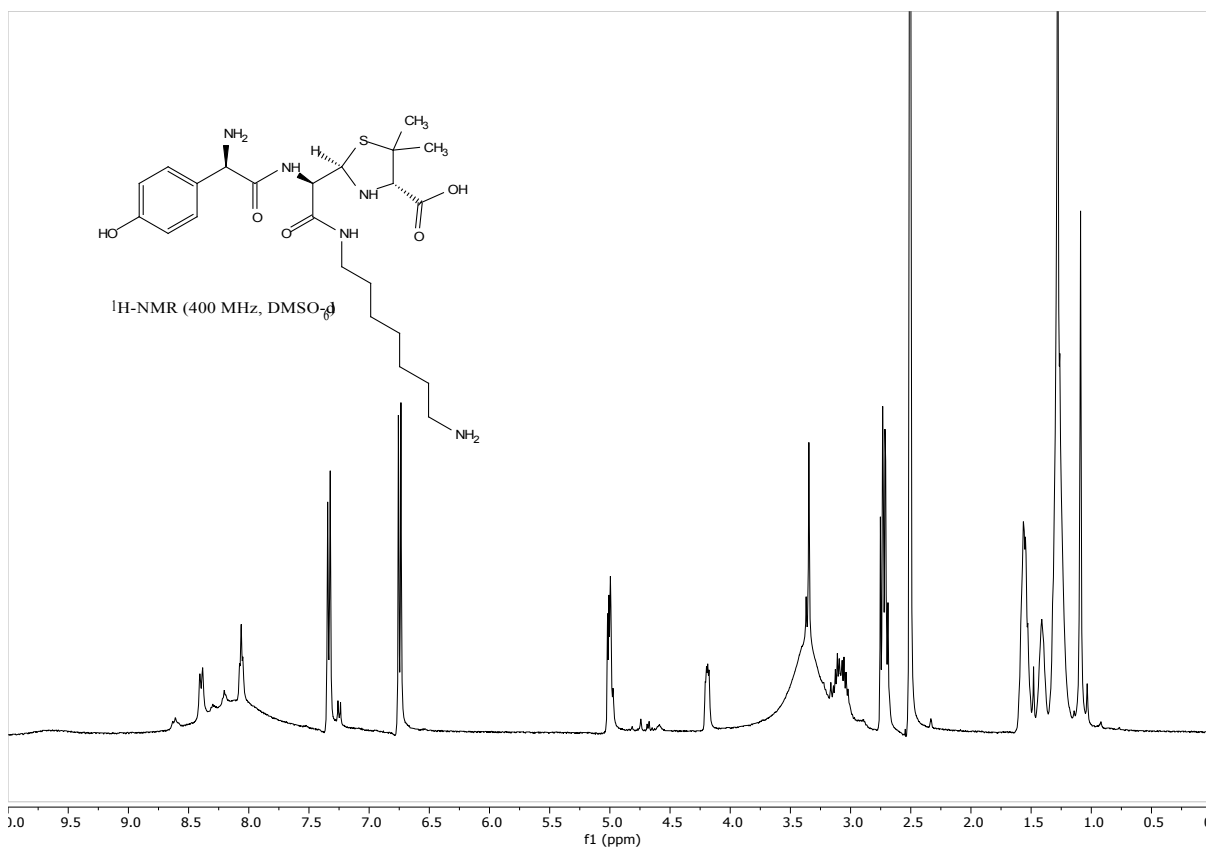

211

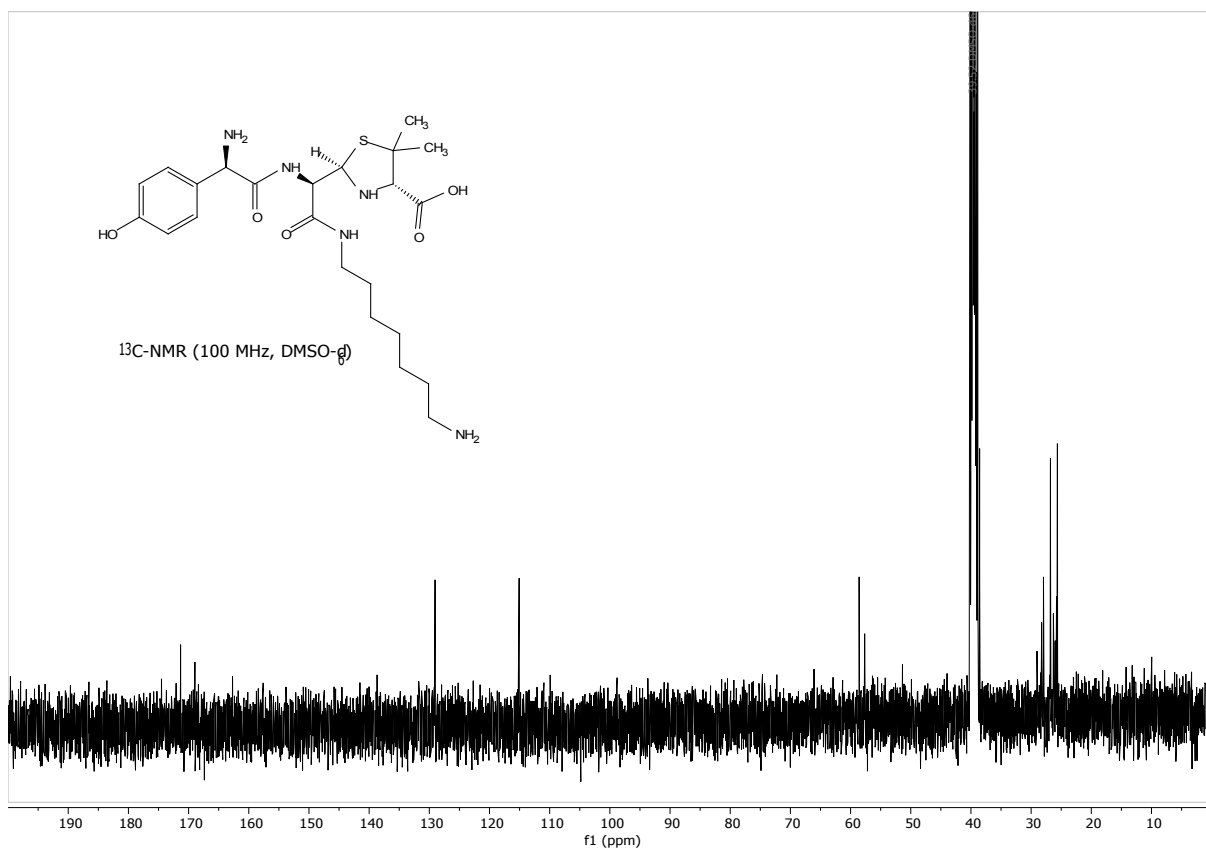

212



213 Hapten 7

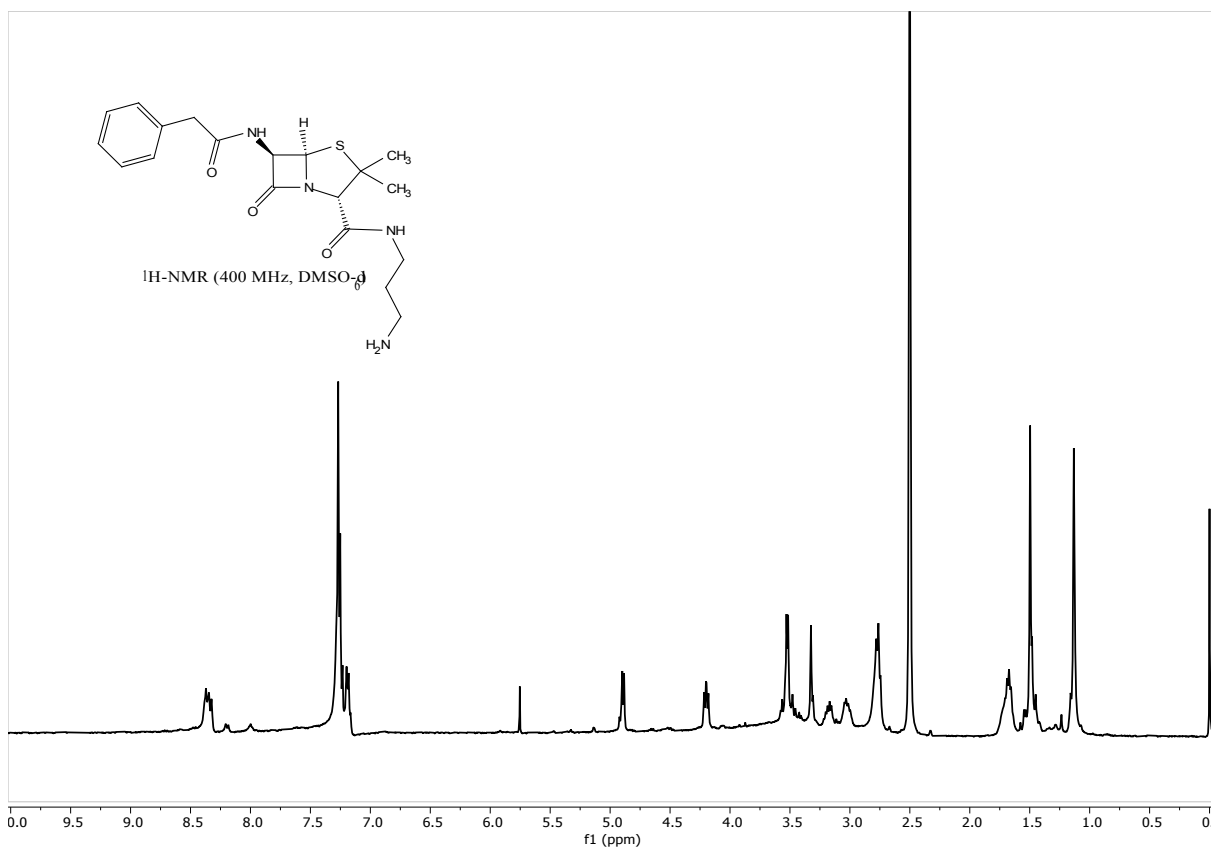

214

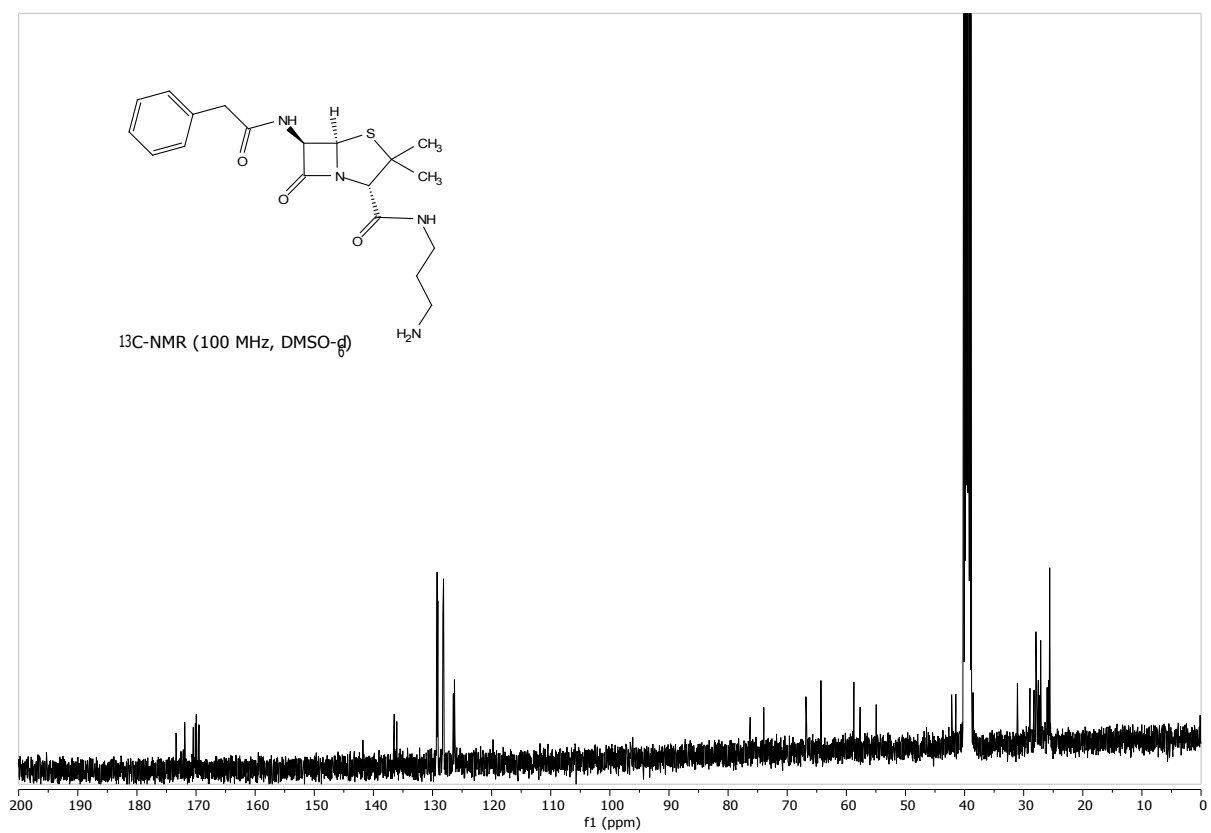

215

216 Hapten 8

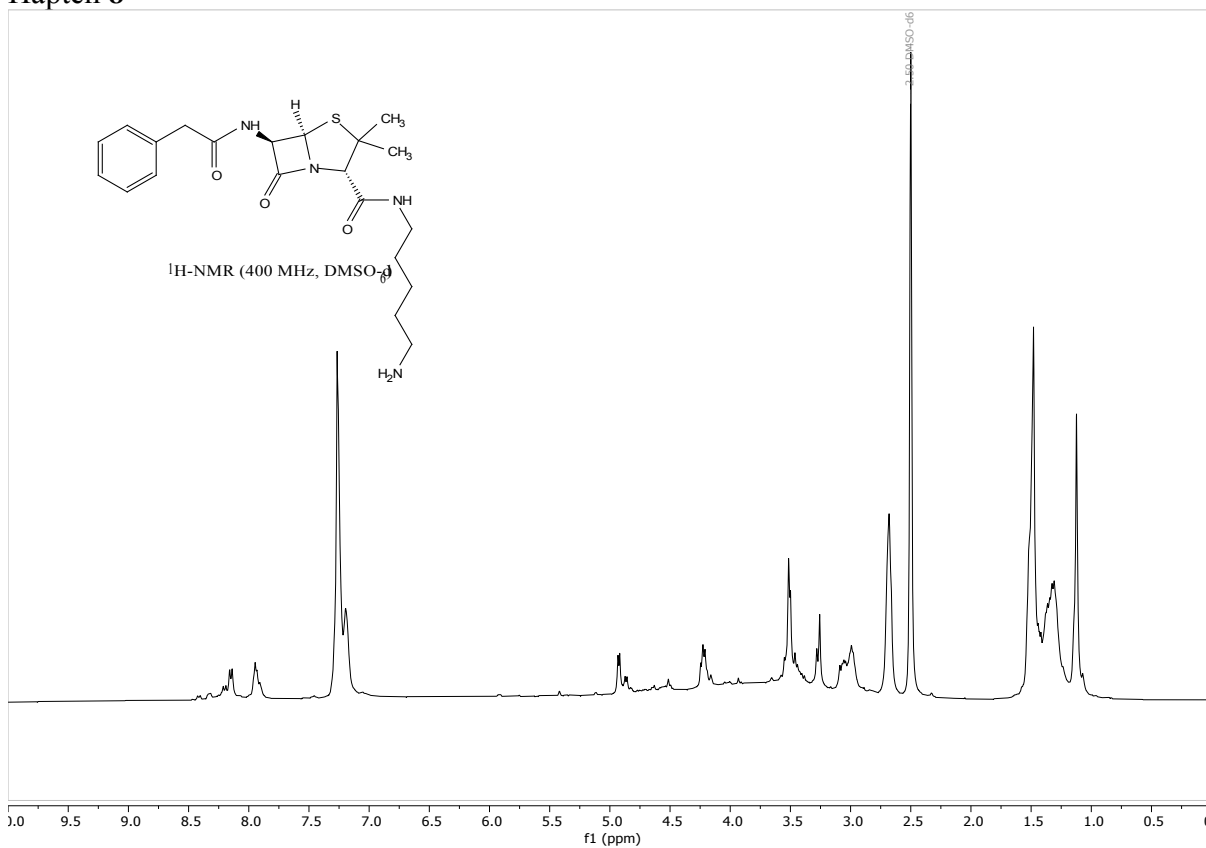

217

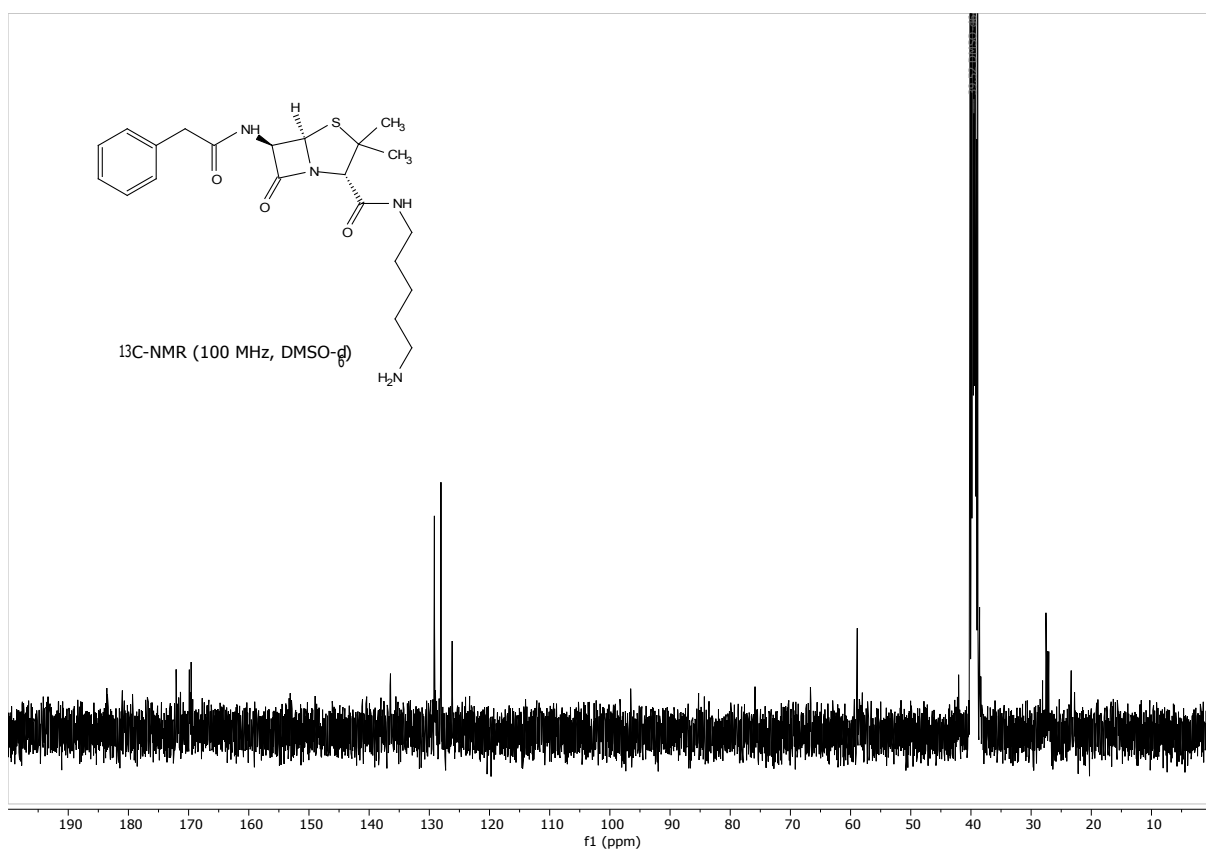

218

219 Hapten 9

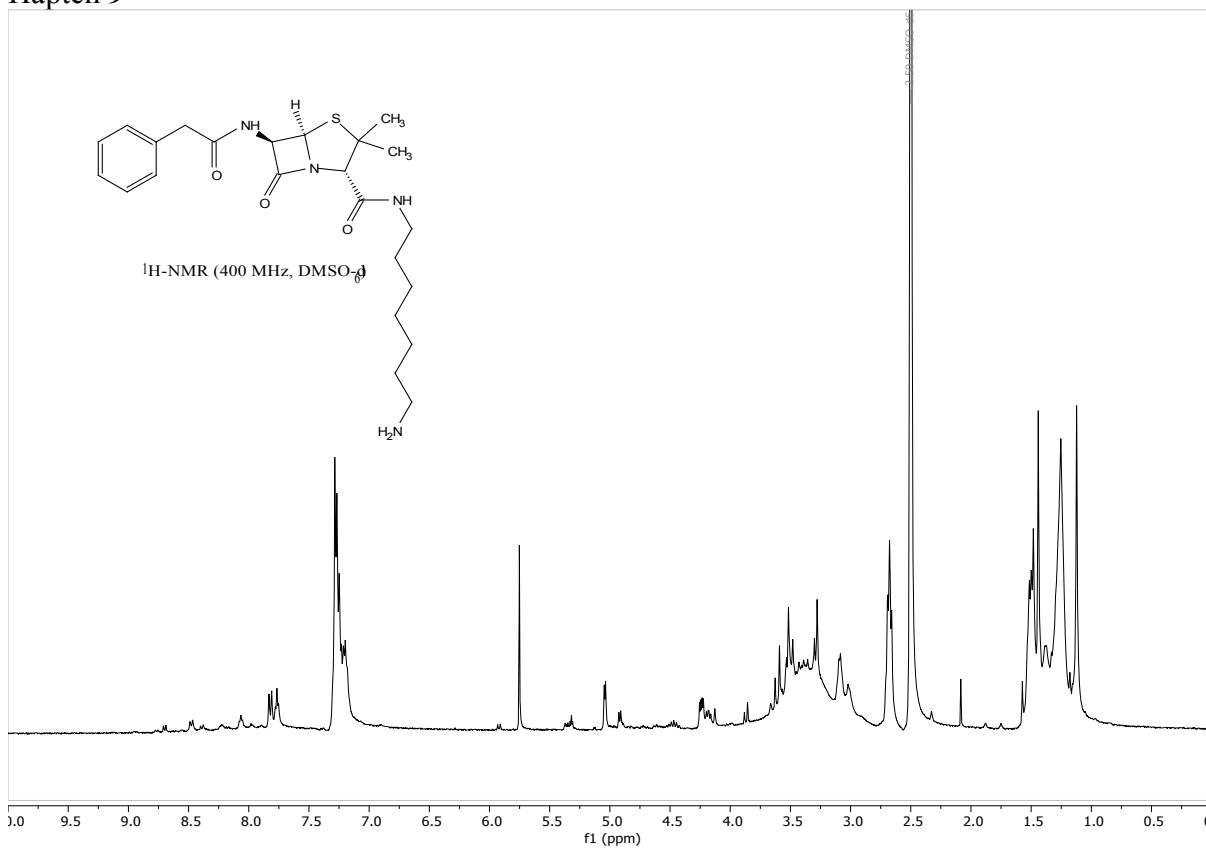

220

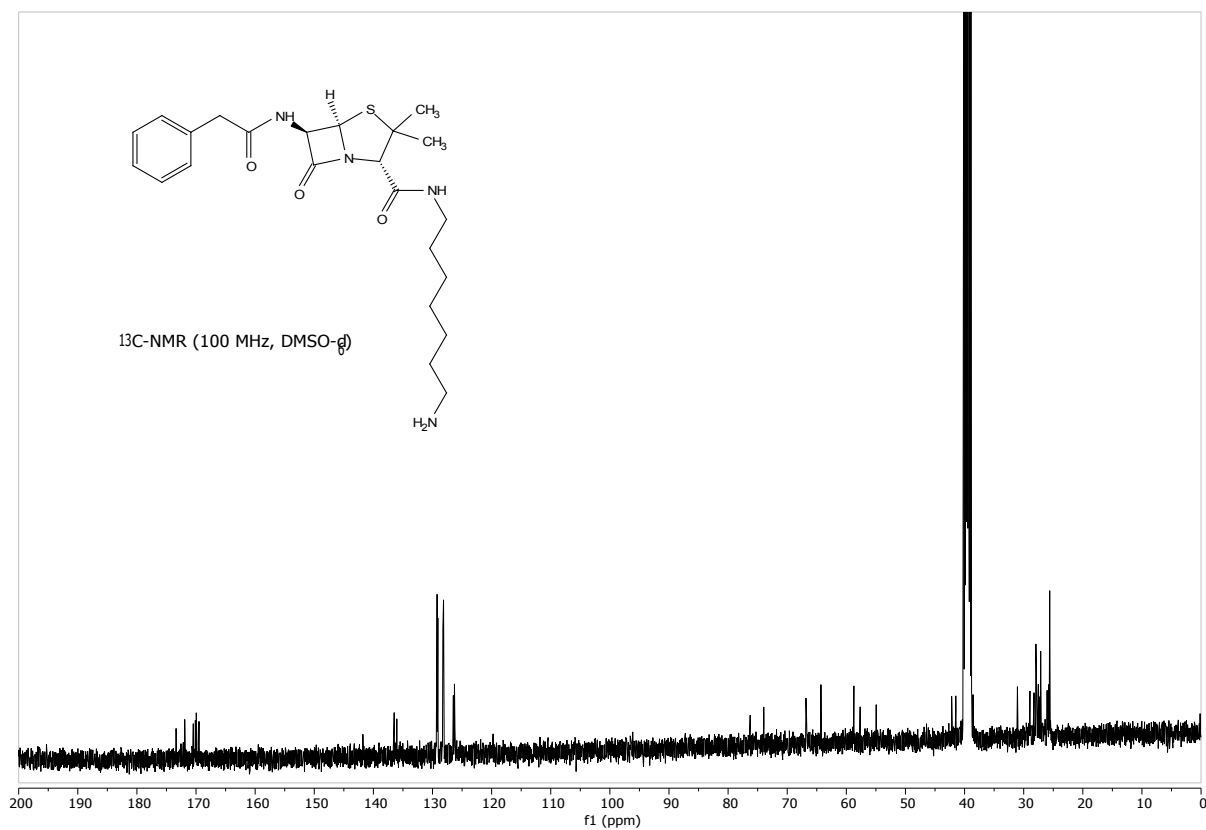

221

222

223 Hapten 10

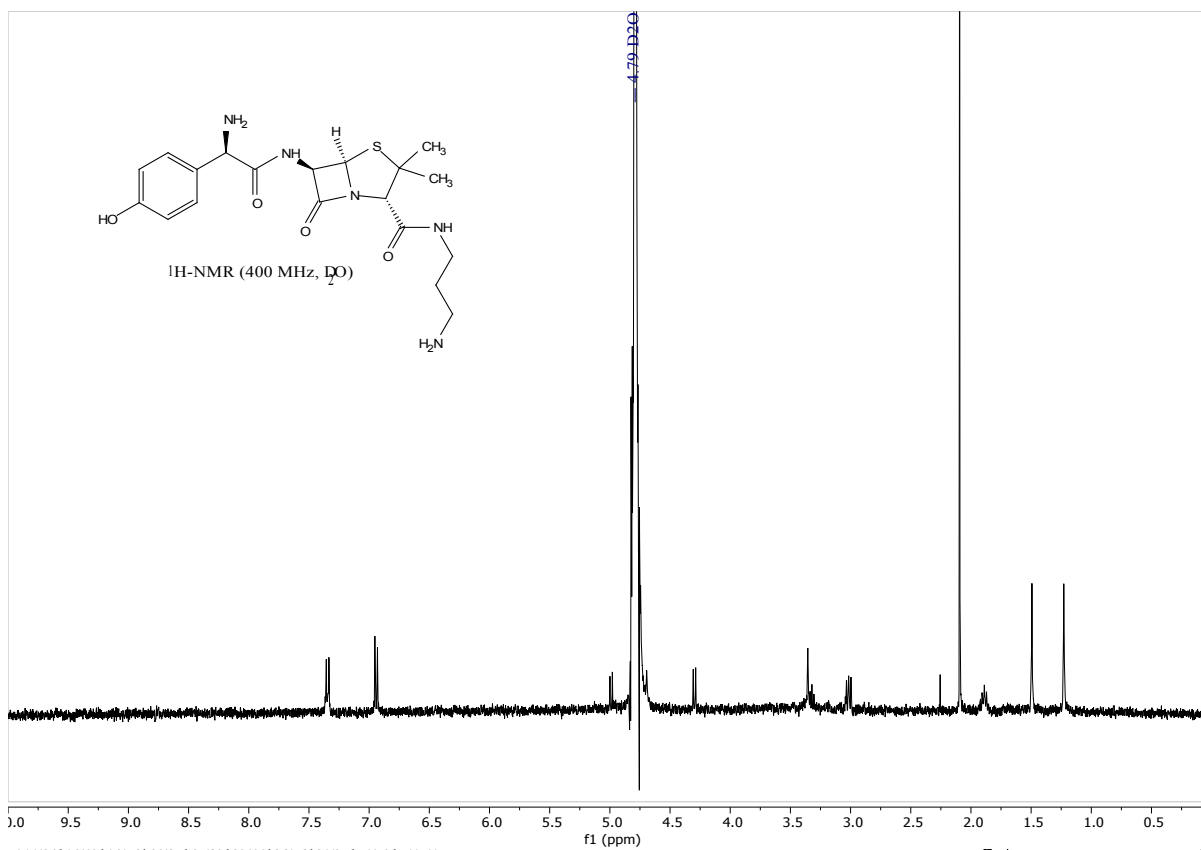

224

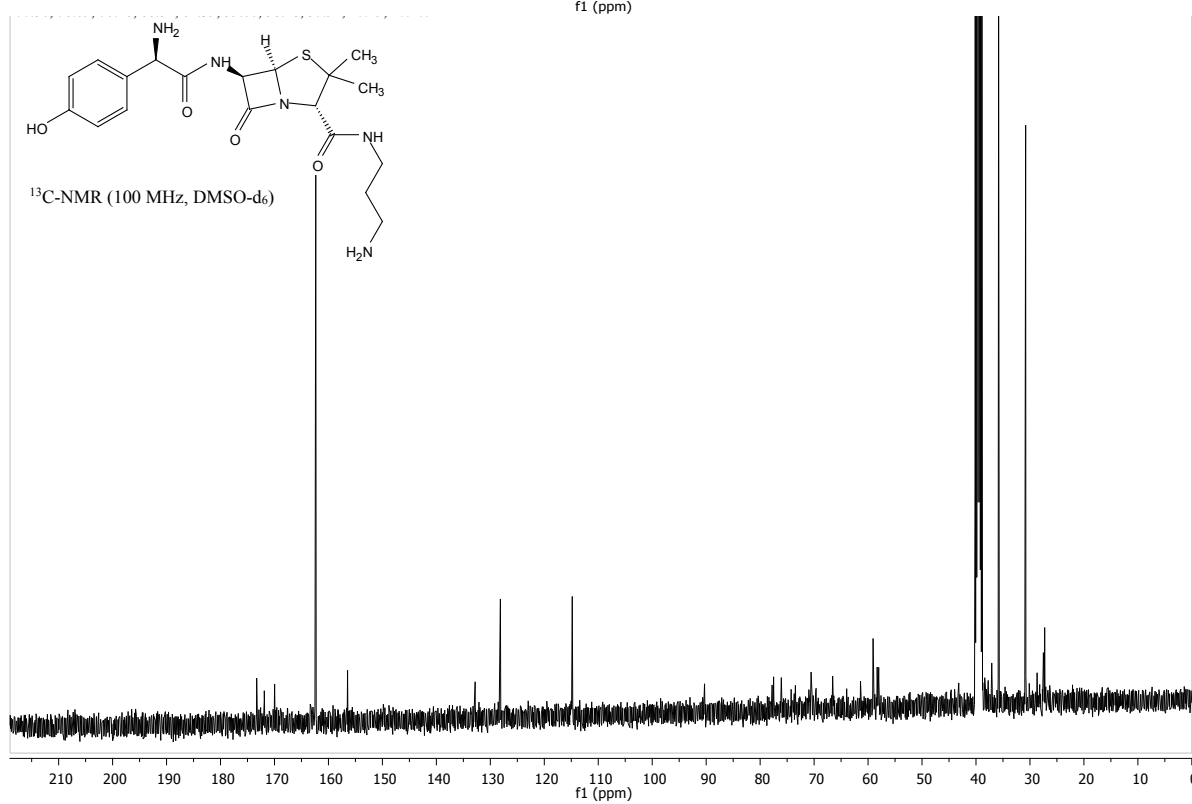

226 Hapten 11

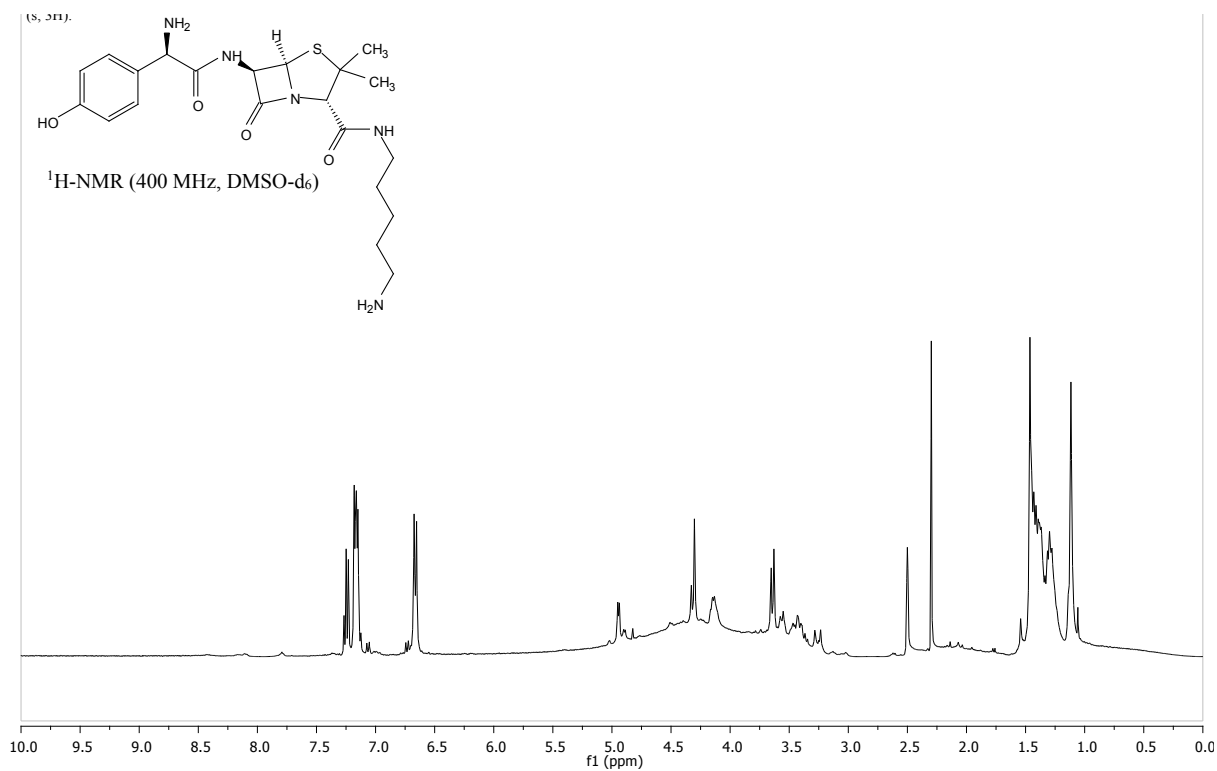

227

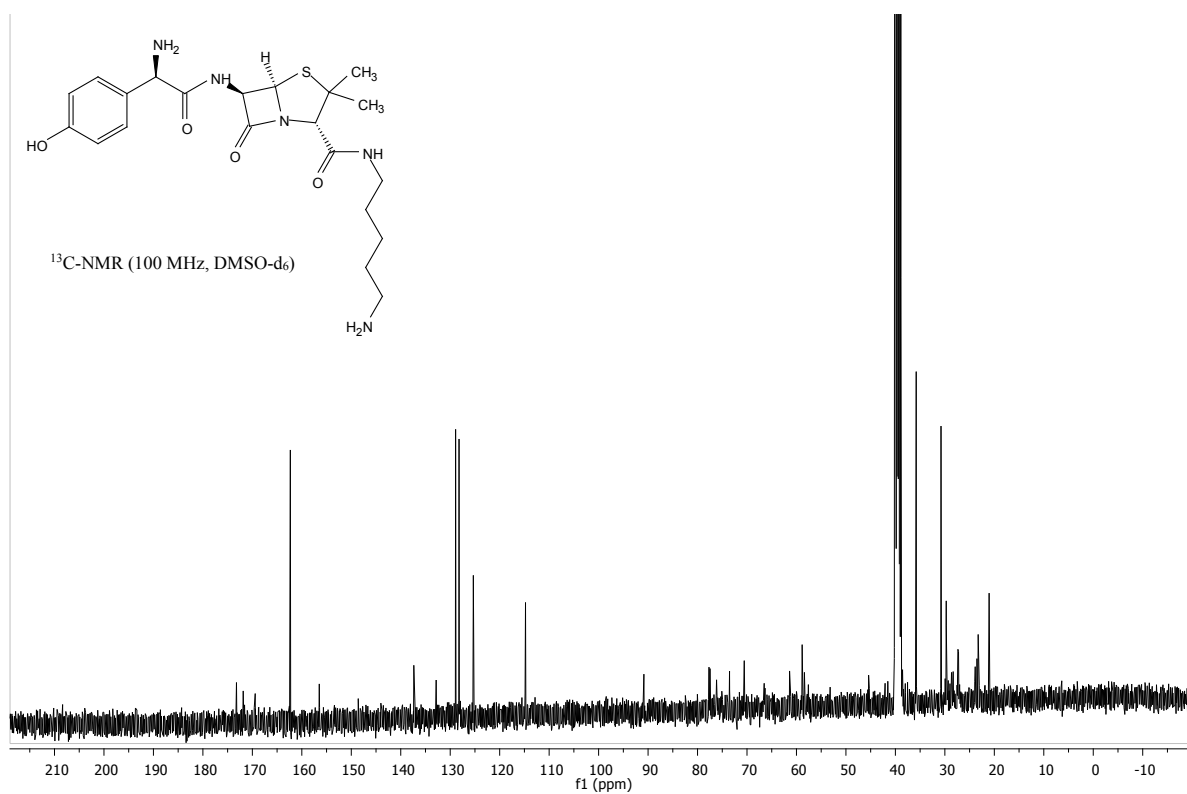

228 Hapten 12

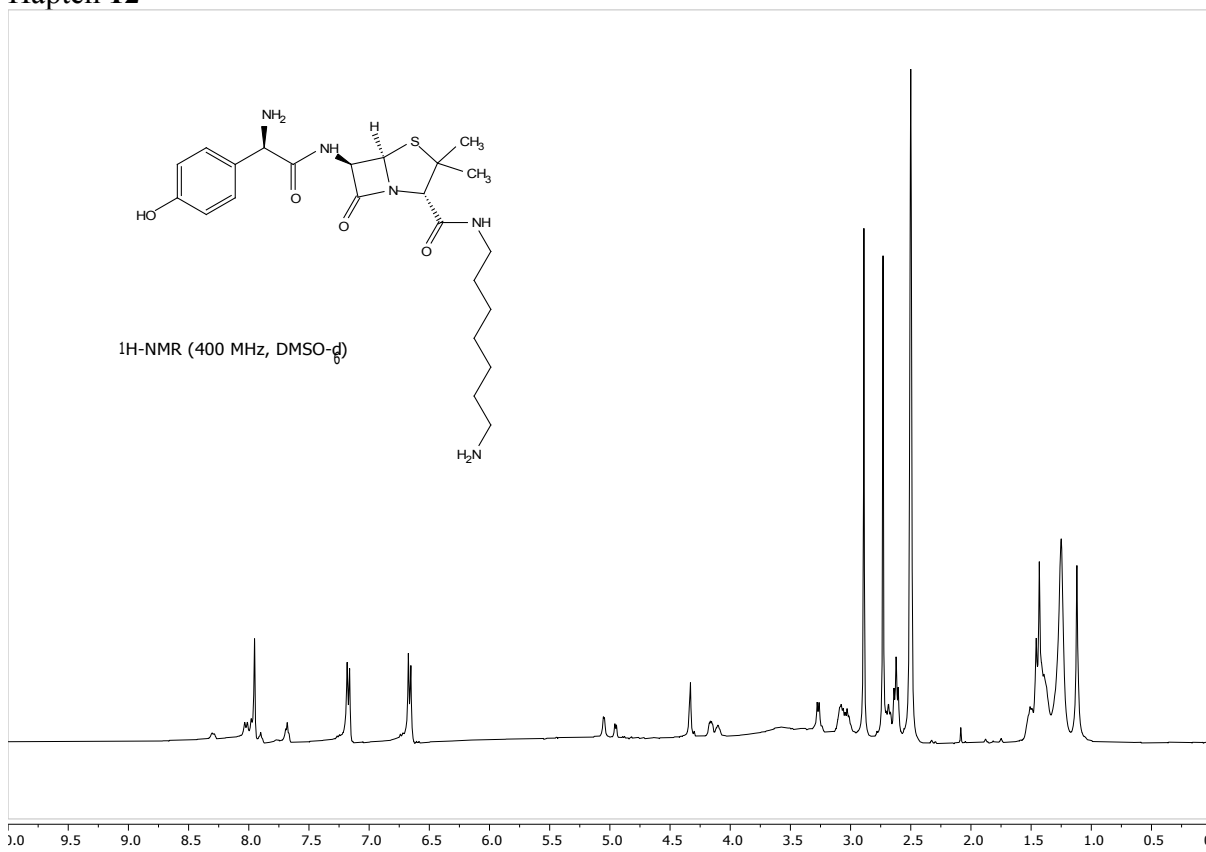

229

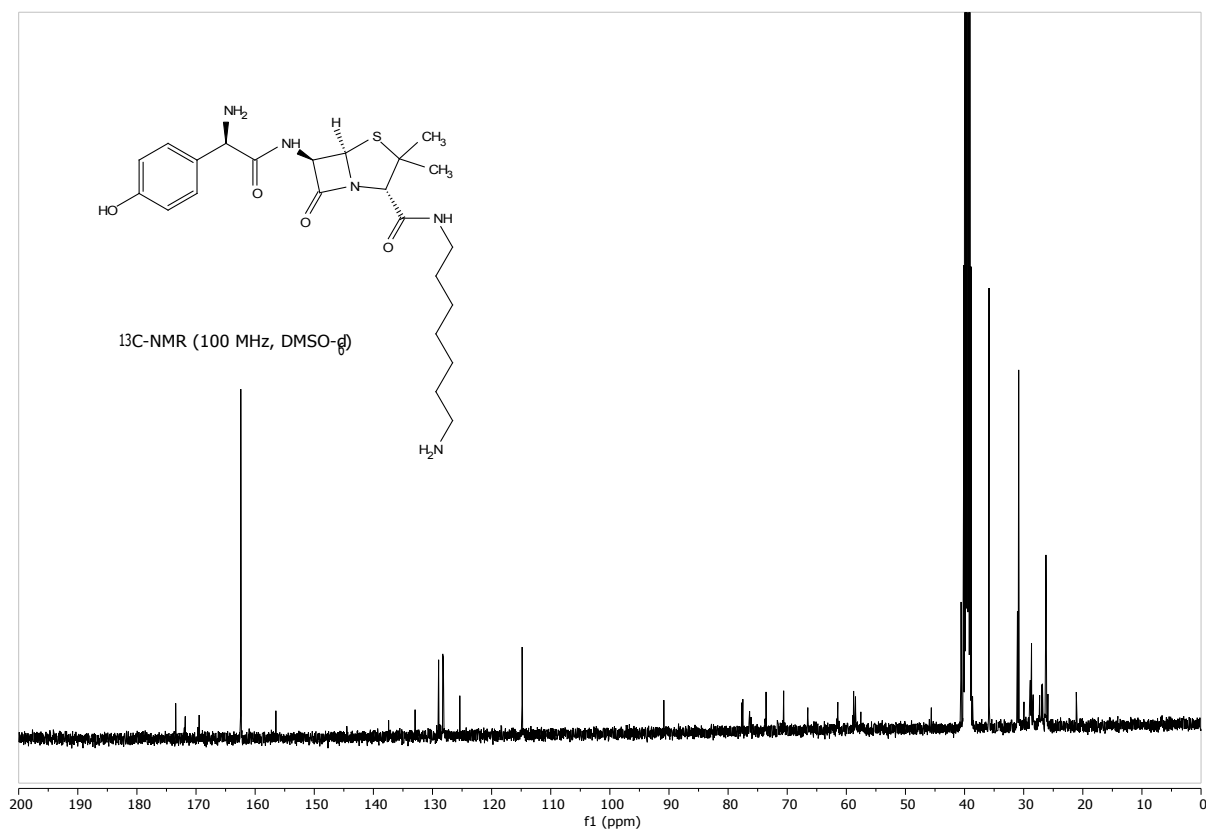

230

231 Hapten 13

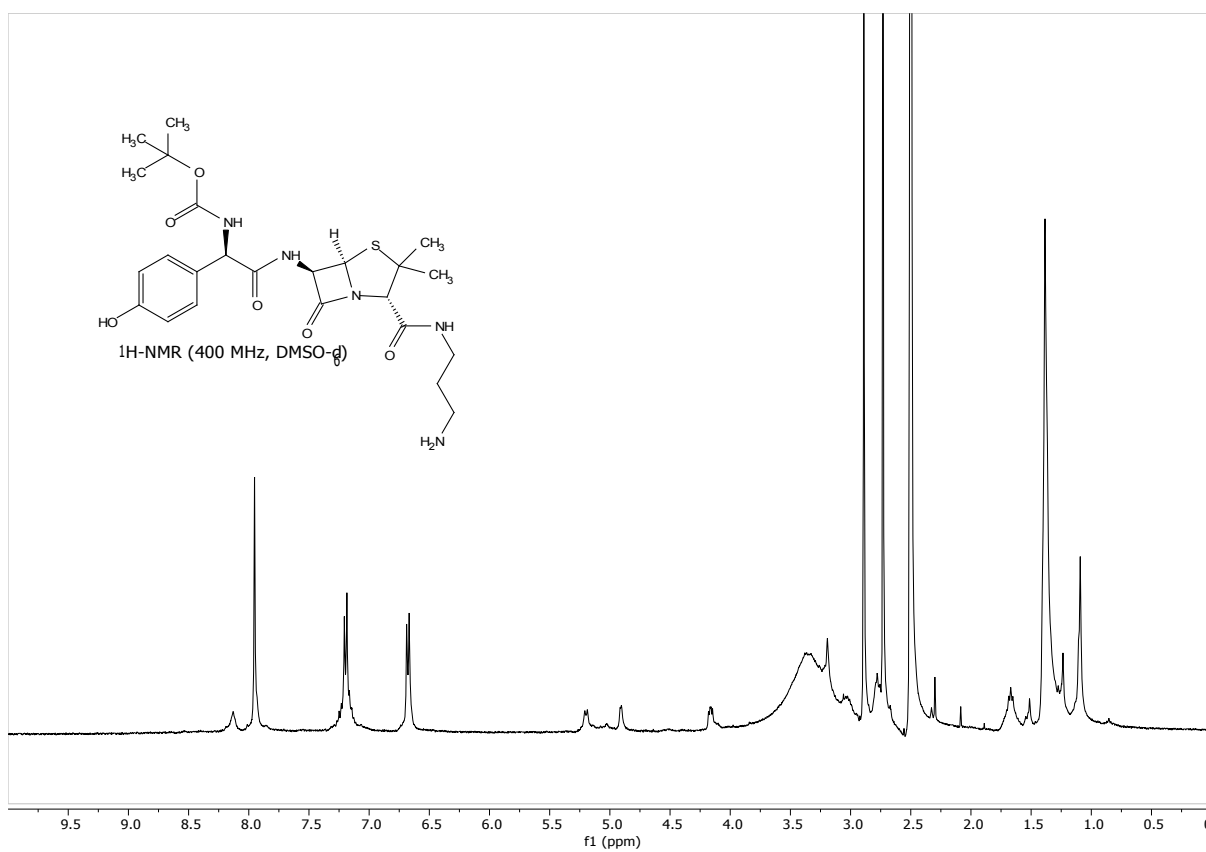

232

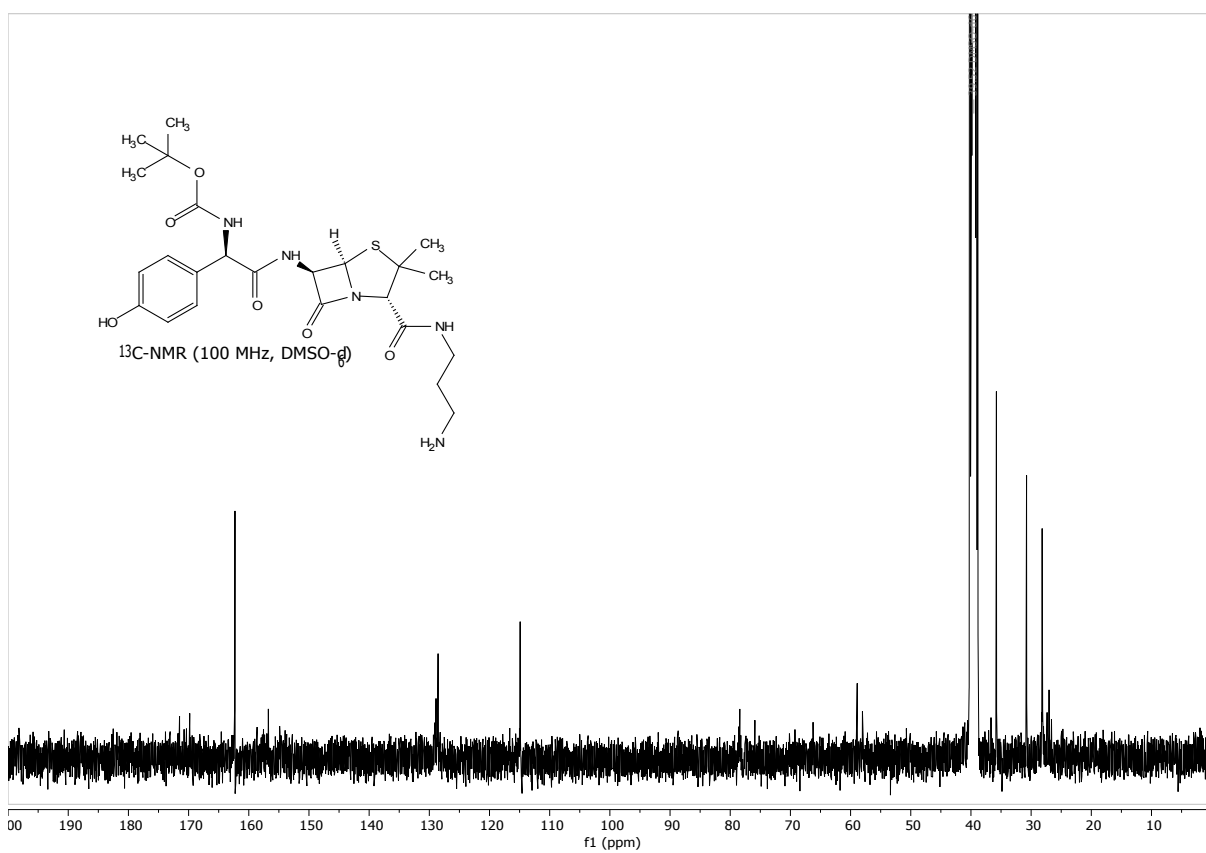

233

## 234 5. Preparation of the antigens

### 235 *Strategy I) Using synthesized haptens*

236 In the case of the PG reference antigen (Scheme S1, entry **14**) and the negative control  
237 (AZT), the conjugation was performed through the lysine residues of the protein HSA by  $\beta$ -  
238 lactam ring opening, through amidation between the carbonyl carbon of the  $\beta$ -lactam ring and  
239 amino group of lysine residues (Scheme S3), as previously described<sup>1</sup> with few  
240 modifications. Briefly, HSA (2.0 mg) dissolved in sodium carbonate 0.5 M, pH 11.0, reacted  
241 with PG or AZT (0.03 mmol, 1000 equiv.) overnight at room temperature.

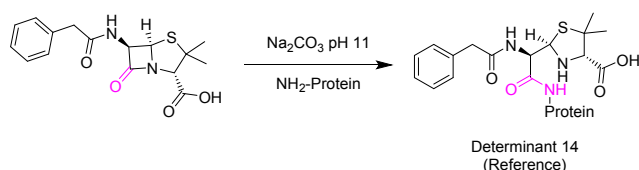

### 242 Scheme S3: PG-oyl formation after $\beta$ -lactam ring opening.

243 Modified -oyl and -anyl antigens were prepared following the carbodiimide chemistry. For  
244 that, HSA (2.0 mg) and the corresponding impure modified BLC hapten (4.0 mg) were  
245 dissolved in 200  $\mu$ L and 1 mL, respectively, of sodium phosphate buffer 0.1 M, NaCl 0.15 M,  
246 pH=7.2. Then, 500  $\mu$ L of the BLC hapten solution was mixed up in an Eppendorf with the  
247 HSA solution (200  $\mu$ L) and EDC (10.0 mg) was added. The solution was allowed to react at  
248 room temperature for 2 hours.

249 All antigens were purified by gel filtration chromatography on Amicon Ultra 0.5 pre-  
250 concentrated 10 K filters using PBS 1X, pH 7.4, as elution buffer. Finally, they were diluted to  
251 1.0 mg/mL and stored at -20  $^{\circ}$ C until used. Protein quantification was performed by the  
252 Coomassie/Bradford<sup>2</sup> colorimetric assay. Molar ratios protein-hapten were determined by  
253 MS-MALDI-TOF<sup>3</sup>.

### 254 *Strategy II) Using cationized carrier molecules*

255 Diamine dihydrochloride salts used in this study were ethylene diamine, 1,4-diaminobutane  
256 and 1,4-phenylenediamine. Major antigens were produced with this strategy and the carrier  
257 proteins used were HSA and H1.

258 In order to cationize carrier proteins, 1.0 mmol of the corresponding diamine dihydrochloride  
259 salt (1 equiv) dissolved in 600  $\mu$ L of MES 0.1 M, pH 4.7 (coupling buffer) was mixed up  
260 with 2.0 mg of the carrier protein dissolved in 200  $\mu$ L of coupling buffer. Then, an EDC  
261 hydrochloride solution of 10 mg/mL in coupling buffer was prepared and 200  $\mu$ L of this  
262 solution was added to the reaction mixture. The solution was allowed to react overnight at  
263 room temperature. Cationized proteins were purified by gel filtration chromatography on 10  
264 K precentred filters using sodium carbonate 0.5 M, pH 11.0, as the elution buffer for the  
265 following conjugation step.

266 Then, a solution of the corresponding BLC (1,000 equiv.) in sodium carbonate 0.5 M, pH  
267 11.0, was added to the solutions. The reactions were allowed to stir at room temperature  
268 overnight. Purification and quantification of the protein-modified antigens were performed as  
269 explained in Strategy I.



270 6. MS-MALDI-TOF spectra

271 The molecular weight (MW) of each antigenic determinant was calculated from the peak  
272 centroid of the peaks according to the following equation:

273  $[MW(\text{determinant}) - MW(\text{protein})] / MW(\text{hapten})$ .

274 The incremental change in molecular weight due to incorporation of hapten molecules to  
275 protein corresponds to the number of hapten molecules per protein molecule.

276 Control HSA

**AB Sciex TOF/TOF™ Series Explorer™ 72094**

TOF/TOF™ Linear Spec #1 MC=>SM5=>MC[BP = 66454.3, 5611]

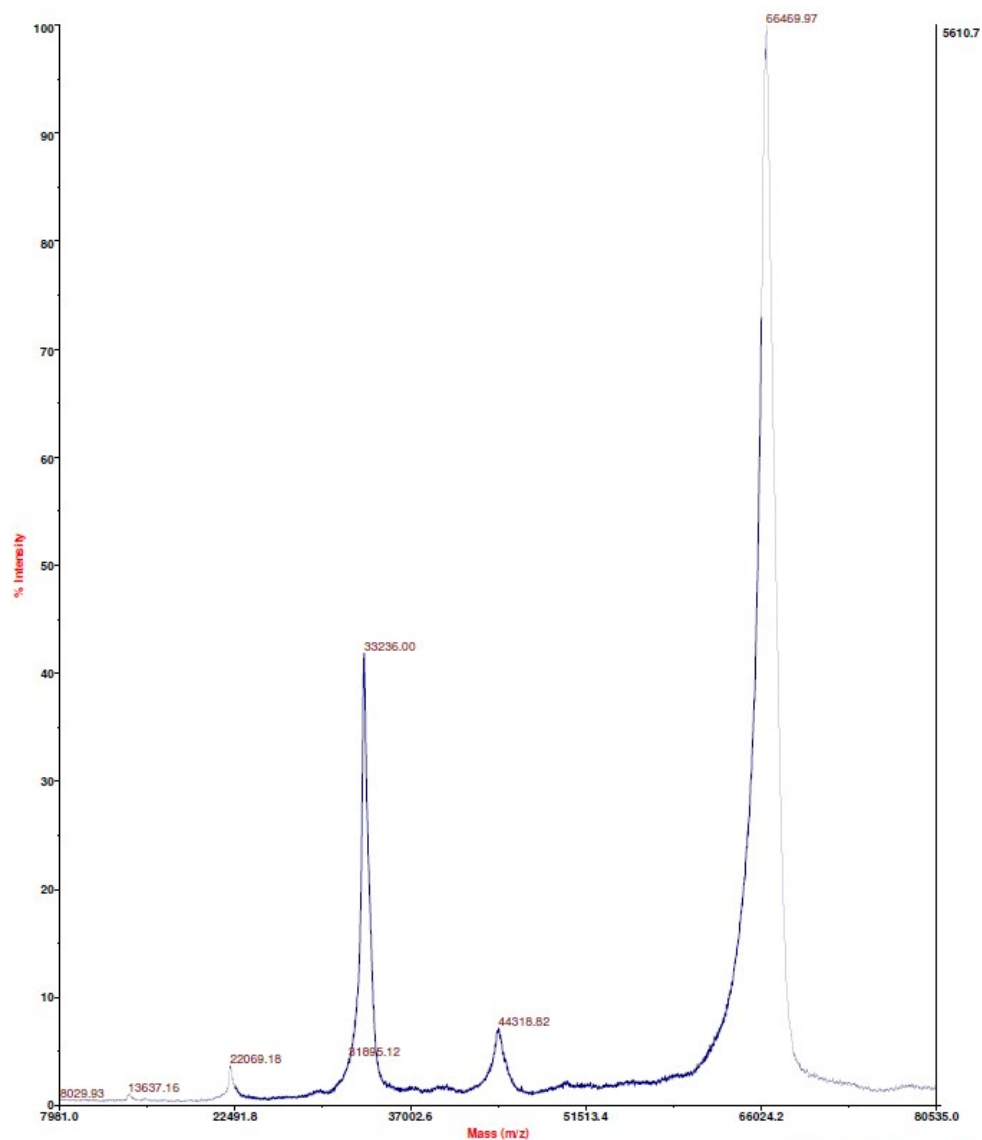

Printed: 20:05, January 25, 2018

277 C:\AB SCIEX\TOF\TOF Data\Export\T2D\Proteomica\p 171030 180123\H2 LINEAR.l2d

278

**AB Sciex TOF/TOF™ Series Explorer™ 72094**

TOF/TOF™ Linear Spec #1 MC=>SM5=>SM5=>MC[BP = 67712.1, 1624]

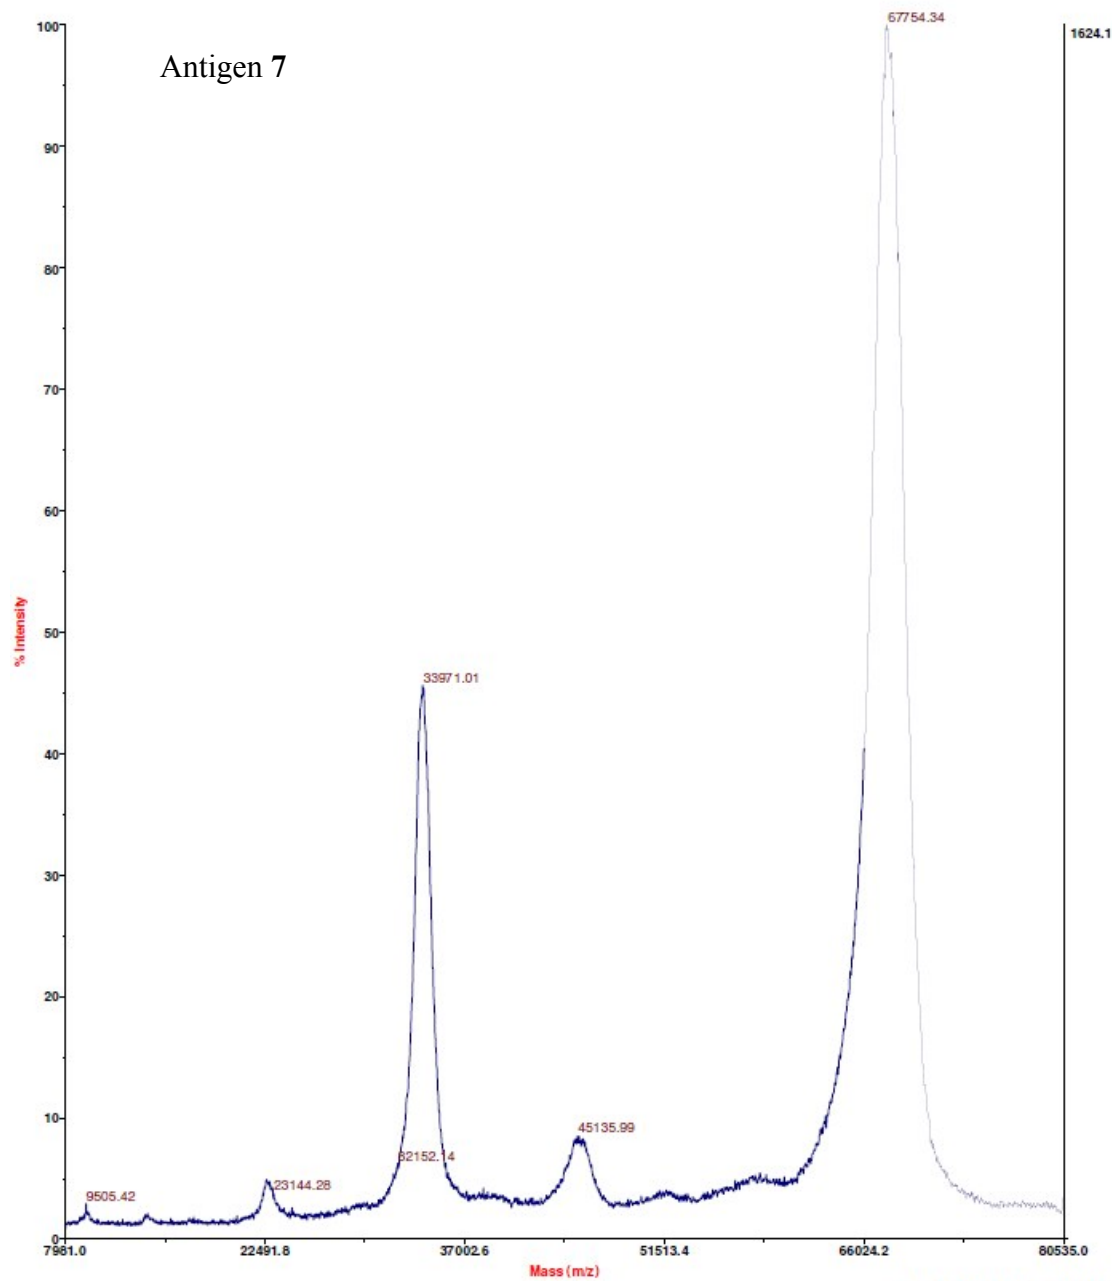

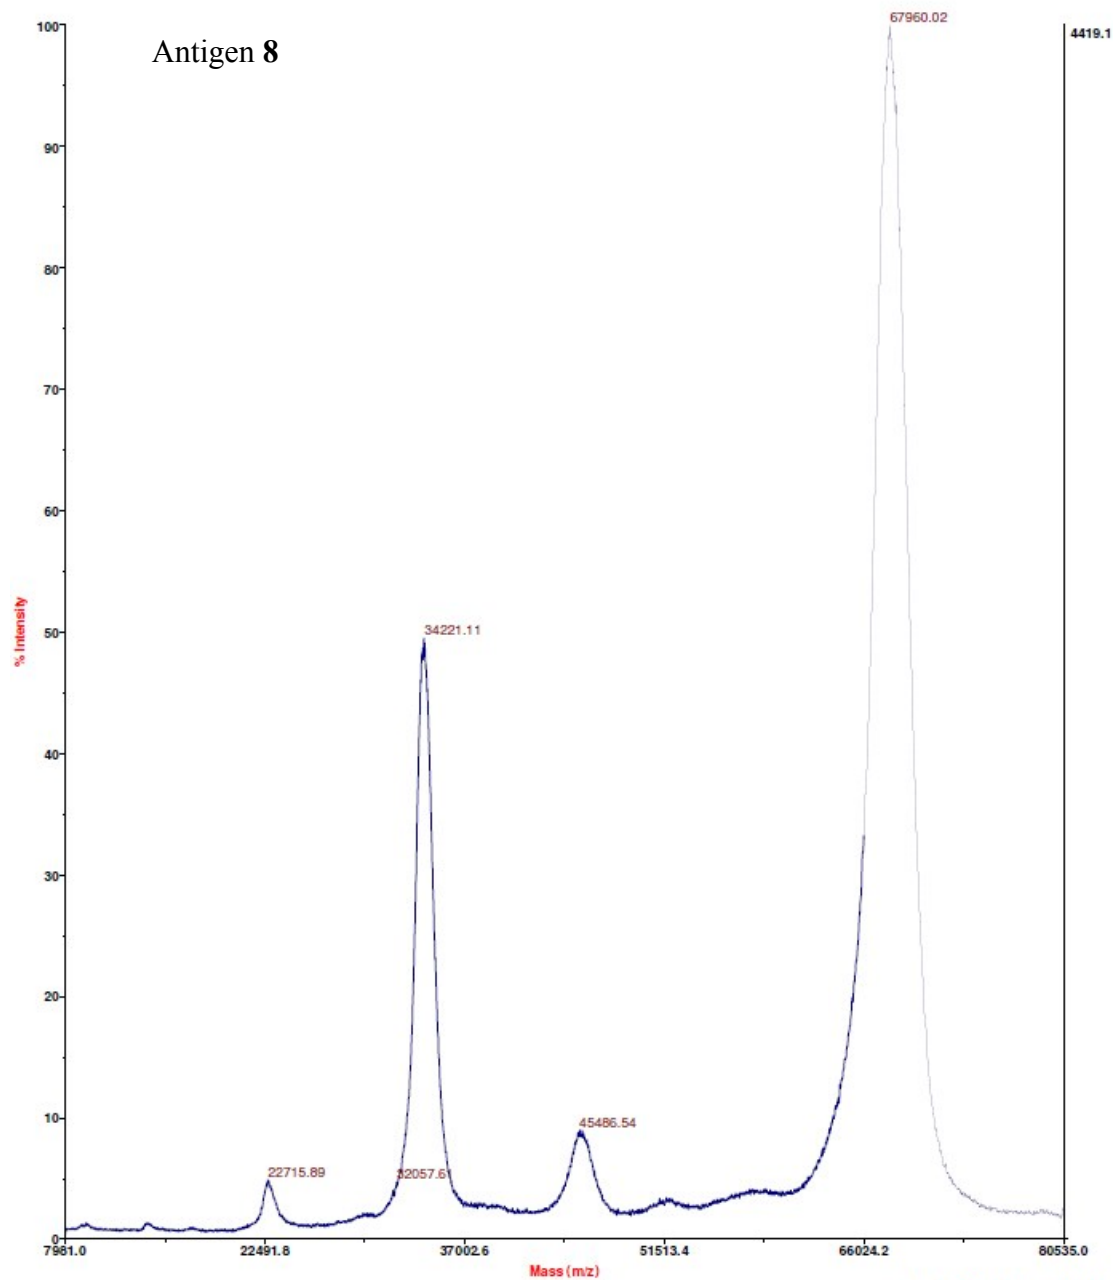

Printed: 20:07, January 25, 2018

AB Sciex TOF/TOF™ Series Explorer™ 72094

TOF/TOF™ Linear Spec #1 MC=>SM5=>SM5=>SM5=>MC[BP = 67873.1, 1746]

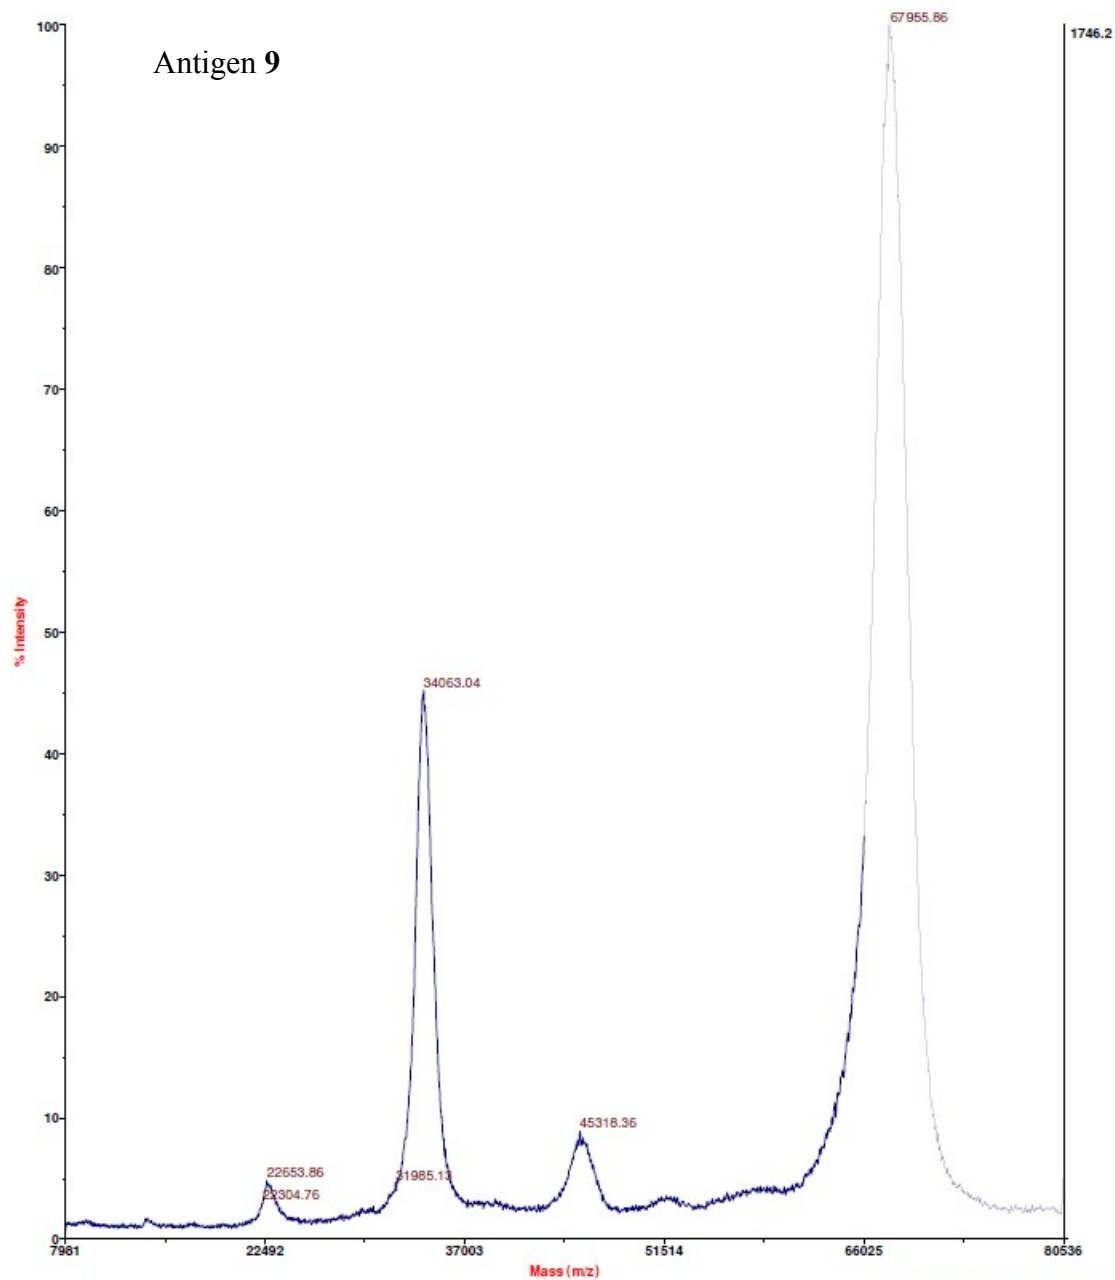

Printed: 20:07, January 25, 2018

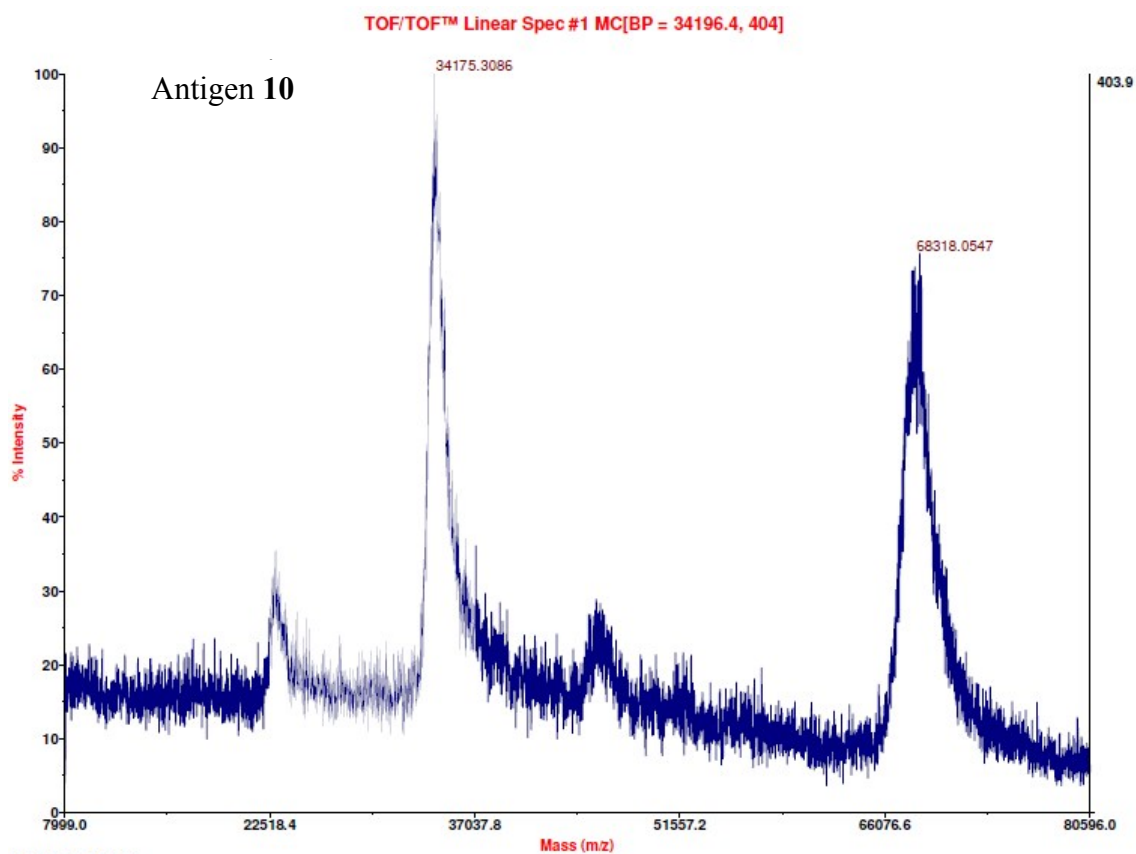

284 Z:\...M17\_LINEAR\_1.t2d  
Acquired:

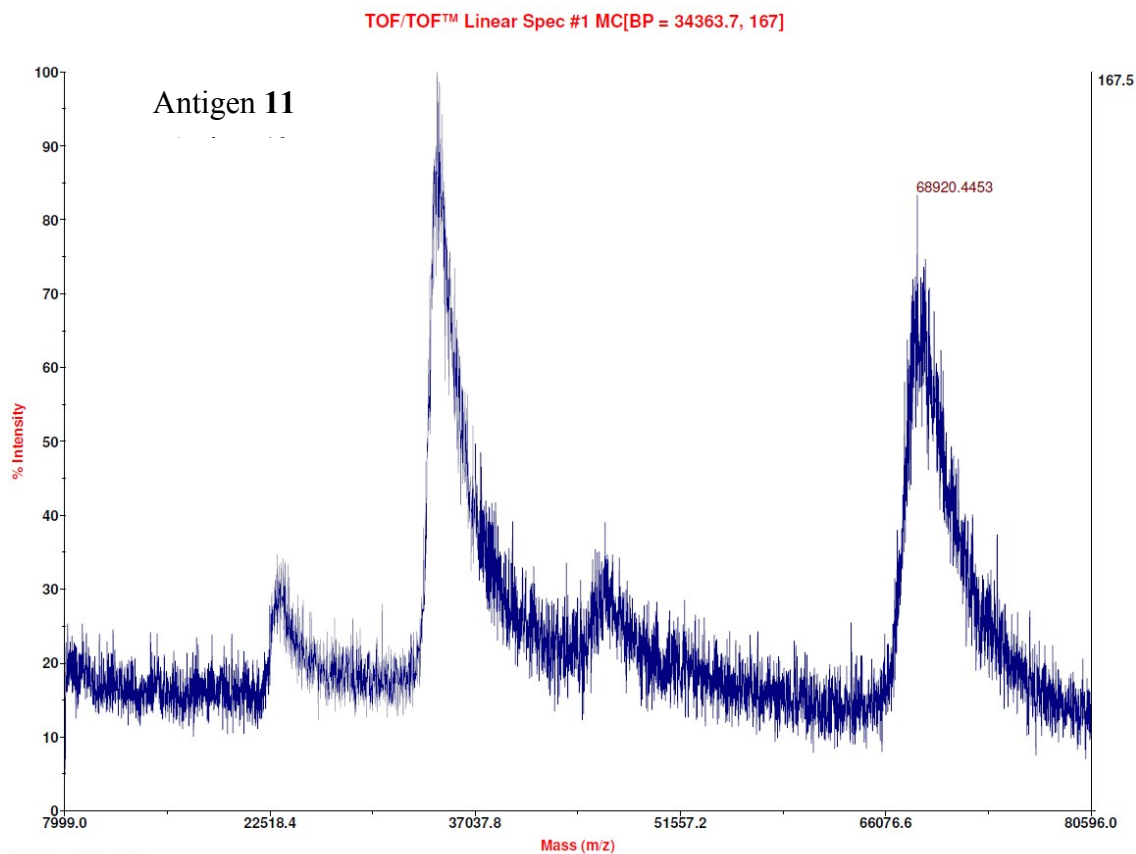

285 Z:\...M18\_LINEAR\_2.t2d  
Acquired:

286

TOF/TOF™ Linear Spec #1 MC[BP = 34356.1, 127]

287

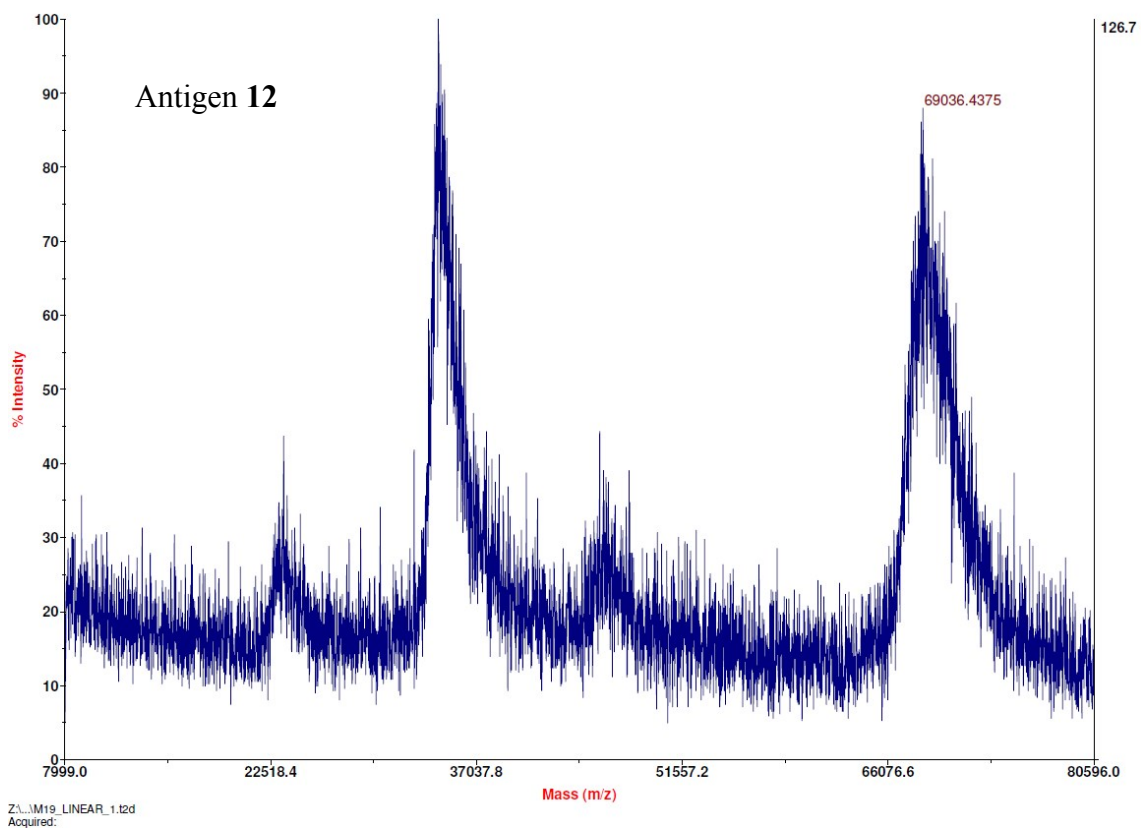

288 7. Assay protocol for the evaluation of the structural antigens

289 Assays consist on the detection of specific IgG (Figure S1, assay I) and IgE (Figure S1,  
290 assays II and III) on standard DVDs (CD Rohling-up GmbH, Saarbrücken, Germany). For  
291 that, antigens (40 µg/mL) and controls (negative and positive), prepared in printing buffer,  
292 were spotted in microarray format (20 arrays per disk of 4 × 4 spots, Figure S2a) by  
293 dispensing 25 nL of each one, using a noncontact printing device (AD 1500 BioDot, Inc.,  
294 Irvine, CA). The spots were 500 µm in diameter with a center-to-center distance of 1.0 mm.  
295 Within each microarray (Figure S2b-c), spots for each antigen (two replicates, position 3-8)  
296 and negative (HSA, position 1) and positive (rabbit IgG or human IgE, position 2) controls  
297 are included. After printing, the DVD was incubated for 16 h at 37 °C.

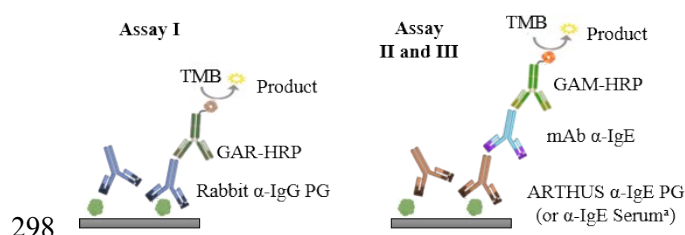

299 **Figure S1:** Scheme of the microimmunoassays I, II and III based on a direct format with  
300 colorimetric detection. <sup>a</sup>α-IgE serum from allergic patients and controls was used in assay III.  
301

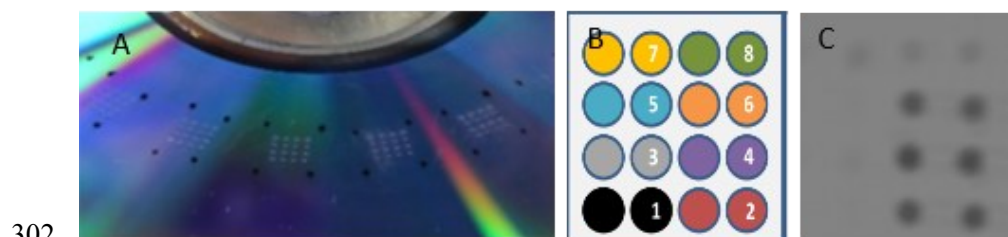

303 **Figure S2:** A) Image of the array on the DVD surface; B) Lay-out of the antigens and  
304 controls printed on the DVD (Position 1: HSA, negative control, C(-); 2: human IgE, positive  
305 control, C(+); 3: Aztreonam-oyl antigen, negative control C(-); 4-7: antigen 1-4; 8: Reference  
306 antigen); C) Representative image of the array with specific antigens and controls printed on  
307 the DVD. Artificial human serum specific to PG was used.  
308

309 For the detection of specific IgG to penicillins, different dilutions (1/1,000-1/32,000) of  
310 rabbit sera and control (PBS-T) (25 µL per sample) were added to each array and incubated  
311 for 15 min. Then, the DVD was washed with PBS-T and water and 25 µL of the polyclonal  
312 secondary antibody GAR-HRP in PBS-T buffer (dilution 1/400) was added for 15 min  
313 followed by the washing step. For the detection of specific IgE, 25 µL of sample was added  
314 to each array. Samples were incubated for 15 min when artificial human serum<sup>4</sup> was used,  
315 while serum samples from allergic patients and controls were incubated for 30 min. After  
316 washing, 25 µL of mAb-IgE in PBS-T buffer (1.0 µg/mL) was added and incubated for 15  
317 min. After washing as before, 25 µL of a 1/100 dilution of GAM-HRP was added for 15 min.  
318 Finally, immunoreaction was developed in all immunoassays by homogenously dispensing  
319 1.0 mL of TMB along the whole disc surface. The reaction was stopped by washing the disk

320 with water after 15 min. Signals were read by a modified DVD drive and the data was  
321 analysed as previously described<sup>5,6</sup>. All experiments were repeated 3 times.

322 BLC-specific IgE levels expressed as units of specific IgE (IU/mL) were determined, using  
323 the 3<sup>rd</sup> WHO standard for total serum IgE content involving heterologous interpolation. The  
324 calibration curve was built performing a sandwich immunoassay where 3<sup>rd</sup> WHO  
325 International Standard was used as calibrator and Omalizumab<sup>7</sup> as the capture antibody. All  
326 the other immunoreagents were the same as used for the determination of specific IgE (assays  
327 II and III). The standard data points, signal versus semi-log concentration, were the mean of  
328 10 curves performed on different disks during several days. A four-parameter logistic (4PL)  
329 curve was fitted through the points, using SigmaPlot 11 software.

330 Concentrations of specific IgE were calculated from the calibration curve for total IgE.  
331 Statistical significances between the obtained IgE concentrations for the diamine-derived  
332 antigens and the reference were determined by the Holm-Sidak method using the SigmaPlot  
333 11 software and P values of <0.001 were considered significant.

334



## 335 8. Patients

336 The study of the reactivity of the prepared antigens towards the sera from allergic patients  
337 included patients (I) whose culprit drug was PG, AMX or augmentin and (II) whose culprit  
338 drug was another BLC. A cohort of 35 subjects with negative skin test to BLCs and with  
339 good tolerance to them were used as controls. Clinical characteristics from the 35 patients  
340 included in the study are shown in Supplementary Table S1. All samples from patients and  
341 controls were kindly provided by the Hospital Universitari i Politènic La Fe, Valencia, Spain,  
342 and informed consent for the diagnostic procedures was obtained from all patients. Patients  
343 were diagnosed following the procedure described in the European Network of Drug Allergy  
344 (ENDA) protocol based on skin testing, in vitro tests or drug provocation test, when  
345 necessary. This study was approved by the Hospital Universitari i Politènic La Fe ethical  
346 review committee. All experiments were performed in accordance with the relevant  
347 guidelines and regulations.

348

349 Table S1: Clinical characteristics of the allergic patients.

| Patient | Sex <sup>[a]</sup> | Year birth | Clinical manifestation | Clinical Entity | Time              |
|---------|--------------------|------------|------------------------|-----------------|-------------------|
| 01      | M                  | 1969       | Augmentin              | Anaphylaxis     | Immediate         |
| 02      | F                  | 1978       | Augmentin              | Anaphylaxis     | Immediate         |
| 03      | M                  | 1936       | Augmentin              | Anaphylaxis     | Immediate         |
| 04      | F                  | 1939       | Cefazolin              | Anaphylaxis     | Immediate         |
| 05      | M                  | 1949       | Augmentin              | Cutaneous       | Delayed           |
| 06      | F                  | 1948       | Augmentin              | Anaphylaxis     | Immediate         |
| 07      | F                  | 1967       | Amoxicillin            | Anaphylaxis     | Immediate         |
| 08      | F                  | 1960       | Augmentin              | Anaphylaxis     | Immediate         |
| 09      | M                  | 1956       | Augmentin              | Cutaneous       | Delayed           |
| 10      | F                  | 1982       | Cefuroxime             | Anaphylaxis     | Immediate         |
| 11      | M                  | 1972       | Augmentin              | Cutaneous       | Delayed           |
| 12      | F                  | 1964       | Augmentin              | Cutaneous       | Immediate         |
| 13      | M                  | 1978       | Amoxicillin            | Cutaneous       | NR <sup>[b]</sup> |
| 14      | F                  | 1961       | Augmentin              | Cutaneous       | Immediate         |
| 15      | F                  | 1948       | Amoxicillin            | Inespecific     | Immediate         |
| 16      | F                  | 1946       | Penicillin G           | Inespecific     | Delayed           |
| 17      | M                  | 1977       | Penicillin G           | Cutaneous       | Delayed           |
| 18      | M                  | 1953       | Augmentin              | Cutaneous       | Immediate         |
| 19      | M                  | 1951       | Amoxicillin            | Cutaneous       | Immediate         |
| 20      | M                  | 1964       | Augmentin              | Anaphylaxis     | Immediate         |
| 21      | M                  | 1976       | Amoxicillin            | Cutaneous       | Immediate         |
| 22      | M                  | 1961       | Amoxicillin            | Anaphylaxis     | Immediate         |
| 23      | M                  | 1968       | Amoxicillin            | Cutaneous       | NR                |
| 24      | M                  | 1965       | Augmentin              | Anaphylaxis     | Delayed           |
| 25      | M                  | 1982       | Amoxicillin            | Cutaneous       | Delayed           |
| 26      | M                  | 1982       | Amoxicillin            | Anaphylaxis     | Immediate         |
| 27      | F                  | 1970       | Piperacillin           | Cutaneous       | Immediate         |
| 28      | F                  | 1951       | Amoxicillin            | Cutaneous       | Immediate         |
| 29      | F                  | 1982       | Augmentin              | Cutaneous       | Immediate         |
| 30      | F                  | 1984       | Augmentin              | Cutaneous       | Delayed           |
| 31      | F                  | 1963       | Augmentin              | Cutaneous       | NR                |
| 32      | F                  | 1972       | Augmentin              | Anaphylaxis     | Immediate         |
| 33      | F                  | 1962       | Cefuroxime             | Cutaneous       | Delayed           |
| 34      | M                  | 1963       | Amoxicillin            | Cutaneous       | Immediate         |
| 35      | M                  | 1975       | Augmentin              | Anaphylaxis     | NR                |

350 [a]Sex: F=Female, M=Male; [b]NR=No reported in the clinical history

351

352 Table S2: Results of the analysis of human serum samples

| Patient No | Prick-test <sup>[a]</sup> |     | ImmunoCA P<br>(in IU/mL <sup>[b]</sup> ) |       | Multiplex Immunoassay <sup>[c]</sup><br>(in IU/mL) |      |                                  |      |
|------------|---------------------------|-----|------------------------------------------|-------|----------------------------------------------------|------|----------------------------------|------|
|            |                           |     |                                          |       | Antigen No                                         |      |                                  |      |
|            |                           |     |                                          |       | PG                                                 |      | AMX                              |      |
|            | PG                        | AMX | PG                                       | AMX   | 1b                                                 | 3b   | 4b                               | 5b   |
| 01         | N                         | N   | 13.60                                    | 10.20 | 0.23                                               | 0.48 | <LOD <sup>[e]</sup> <sub>1</sub> | <LOD |
| 02         | N                         | P   | 0.03                                     | 0.16  | 0.34                                               | 0.23 | 0.10                             | 0.09 |
| 03         | N                         | P   | 2.16                                     | 1.64  | 3.65                                               | 0.20 | 0.07                             | <LOD |
| 04         | N                         | P   | 0.00                                     | 0.82  | <LOD                                               | 0.44 | <LOD                             | <LOD |
| 05         | N<br>R                    | NR  | 2.14                                     | 1.01  | 0.66                                               | 0.18 | 0.07                             | <LOD |
| 06         | N                         | P   | 1.83                                     | 0.91  | 3.47                                               | <LOD | <LOD                             | <LOD |
| 07         | N<br>R                    | NR  | 1.02                                     | 0.79  | 1.11                                               | 0.21 | 0.10                             | 0.08 |
| 08         | N                         | P   | 0.08                                     | 0.13  | 0.15                                               | 0.16 | <LOD                             | <LOD |
| 09         | N                         | N   | 0.00                                     | 0.95  | <LOD                                               | 2.75 | <LOD                             | <LOD |
| 10         | N                         | P   | 0.09                                     | 0.74  | <LOD                                               | <LOD | <LOD                             | <LOD |
| 11         | N                         | P   | 0.01                                     | 0.03  | <LOD                                               | <LOD |                                  |      |
| 12         | N                         | P   | 0.02                                     | 0.04  | <LOD                                               | 0.20 |                                  |      |
| 13         | N                         | P   | 0.00                                     | 0.15  | 0.11                                               | <LOD |                                  |      |
| 14         | N                         | P   | 0.12                                     | 0.29  | <LOD                                               | <LOD | <LOD                             | 0.28 |
| 15         | N                         | N   | 0.03                                     | 0.07  | 0.18                                               | <LOD |                                  |      |
| 16         | N                         | N   | 0.01                                     | 0.03  | 0.16                                               | <LOD |                                  |      |
| 17         | N                         | N   | 0.04                                     | 0.06  | <LOD                                               | <LOD |                                  |      |
| 18         | N                         | P   | 0.30                                     | 0.24  | <LOD                                               | <LOD | <LOD                             | <LOD |
| 19         | N<br>R                    | N   | 0.02                                     | 0.12  | 0.16                                               | <LOD |                                  |      |
| 20         | P                         | NR  | 0.03                                     | 0.08  | 0.14                                               | 0.21 |                                  |      |
| 21         | N                         | P   | 0.17                                     | 0.46  | 0.08                                               | <LOD |                                  |      |
| 22         | P                         | P   | 0.00                                     | 0.03  | <LOD                                               | <LOD |                                  |      |
| 23         | P                         | P   | 0.00                                     | 0.09  | <LOD                                               | <LOD |                                  |      |
| 24         | N                         | P   | 0.17                                     | 0.33  | 0.21                                               | <LOD |                                  |      |
| 25         | N                         | P   | 0.03                                     | 0.24  | 0.20                                               | <LOD | <LOD                             | <LOD |
| 26         | N                         | N   | 0.43                                     | 0.99  | 0.62                                               | <LOD | <LOD                             | <LOD |
| 27         | N                         | N   | 0.00                                     | 0.00  | 0.46                                               | <LOD |                                  |      |
| 28         | N                         | P   | 0.00                                     | 0.00  | 0.25                                               | <LOD |                                  |      |
| 29         | N<br>R                    | NR  | 3.01                                     | 7.02  | 2.62                                               | 1.39 | 0.23                             | 0.40 |
| 30         | N                         | N   | 0.05                                     | 0.41  | <LOD                                               | <LOD | <LOD                             | <LOD |
| 31         | N                         | P   | 0.00                                     | 0.01  | 0.15                                               | <LOD |                                  |      |
| 32         | P                         | P   | 0.03                                     | 0.24  | <LOD                                               | <LOD |                                  |      |
| 33         | N                         | N   | 0.00                                     | 0.01  | 0.49                                               | <LOD |                                  |      |
| 34         | N                         | P   | 0.01                                     | 0.69  | <LOD                                               | <LOD | <LOD                             | <LOD |
| 35         | N                         | P   | 0.08                                     | 0.09  | <LOD                                               | <LOD | <LOD                             | 0.07 |

353 Immunoassay values are the mean of at least three replicates and relative standard deviation  
354 (RSD) ranged from 4 to 13%. [a] P= Positive, N= Negative, NR=Not Realized; [b] IU/mL=  
355 2.4 ng/mL; [c]: Multiplex-DVD assay, using H1-oyl antigens; [d] Augmentin is a

356 combination of AMX and potassium clavulanate; [e] <LOD= Value below the limit of  
357 detection (LOD).

358

359 9. Experimental references

- 360 1 Z. Zhao, M. Batley, C. D'Ambrosio and B. A. Baldo, *J. Immunol. Methods*, 2000, **242**,  
361 43–51.
- 362 2 M. M. Bradford, *Anal. Biochem.*, 1976, **72**, 248–254.
- 363 3 Y. Wang, C. H. He, H. Zheng and H. Bin Zhang, *Int. J. Mol. Sci.*, 2012, **13**, 84–96.
- 364 4 N. Offermann, M. Plum, U. Hübner, K. Rathloff, I. Braren, M. Fooker and E. Spillner,  
365 *Allergy Eur. J. Allergy Clin. Immunol.*, 2016, **71**, 1794–1799.
- 366 5 A. A. Badran, S. Morais and Á. Maquieira, *Anal. Bioanal. Chem.*, 2017, **409**, 2261–  
367 2268.
- 368 6 P. Dobosz, S. Morais, E. Bonet, R. Puchades and Á. Maquieira, *Anal. Chem.*, 2015, **87**,  
369 9817–9824.
- 370 7 P. P. Belliveau, *MedGenMed*, 2005, **7**, 27.

371
